# Supplementary material for: Not so inert mer -tris-chelate cobalt( iii ) complex of a hydroxy-pyridine functionalized NHC ligand for cyclic carbonate synthesis
Source: Royal Society of Chemistry journal article supplement (doi:10.1039/d4dt02767a), 2024-01-01
Supplement: d4dt02767a1.pdf [file d4dt02767a1.pdf]

## Supporting Information

### Not So Inert *Mer-Tris-Chelate* Cobalt(III) complex of Hydroxypyridine Functionalized NHC ligand for cyclic carbonates synthesis

Rhitwika Chowdhury,<sup>a</sup> Irshad Ahmad Bhat,<sup>a,b</sup> Sharad Kumar Sachan<sup>a</sup> and Ganapathi Anantharaman<sup>\*a</sup>

<sup>a</sup>*Department of Chemistry, Indian Institute of Technology Kanpur, Kanpur-208016,*

*Uttar Pradesh, India.*

*email: garaman@iitk.ac.in*

---

#### Table of contents

|                                                                                |       |
|--------------------------------------------------------------------------------|-------|
| 1. Experimental Details .....                                                  | 2     |
| 2. Materials and methods.....                                                  | 2     |
| 3. Preparation of <b>2</b> .....                                               | 2     |
| 4. Procedure of CO <sub>2</sub> cycloaddition reactions.....                   | 2-3   |
| 5. Reusability of the catalyst.....                                            | 3     |
| 6. Crystallographic table of <b>2</b> .....                                    | 4-6   |
| 7. <sup>1</sup> H NMR spectrum of <b>2</b> .....                               | 7     |
| 8. <sup>13</sup> C NMR, and ESI-MS spectra of <b>2</b> .....                   | 8     |
| 9. <sup>1</sup> H and <sup>13</sup> C NMR spectra of <b>4a-4h</b> .....        | 9-17  |
| 10. NMR and ESI-MS spectra of intermediate from <b>2</b> and ECH .....         | 18-19 |
| 11. NMR and IR spectra of intermediate from <b>2</b> and CO <sub>2</sub> ..... | 20-21 |
| 12. Variable temperature NMR spectra of <b>2</b> .....                         | 21    |
| 13. Proposed reaction mechanism without using cocatalyst.....                  | 22    |
| 14. NMR spectral study on the reusability of <b>2</b> .....                    | 23    |
| 15. Comparison table of <b>2</b> with known catalysts.....                     | 24    |
| 16. References.....                                                            | 25    |

---

<sup>b</sup>Current address: *Department of Chemistry, Amar Singh College, Cluster University Srinagar, Jammu and Kashmir-190008, India*

## Experimental Details

### Materials and methods:

Glasswares were dried in the oven at 100 °C before use. The chemicals CoBr<sub>2</sub>, K<sub>2</sub>CO<sub>3</sub>, 2-chloro-3-hydroxypyridine, 1-methyl imidazole, allyl glycidyl ether, neopentyl glycol diglycidyl ether, 2,3-epoxypropyl phenyl ether (Sigma Aldrich), epichlorohydrin (ECH), styrene oxide, 1,2-epoxy hexane, and 1,2-epoxy cyclohexane (TCI) were purchased. **1** was prepared according to the already reported procedure.<sup>[1]</sup> <sup>1</sup>H NMR and <sup>13</sup>C NMR spectra were recorded on JOEL-DELTA 400 MHz and 500 MHz spectrometers, and the chemical shifts were referenced to tetramethylsilane (TMS). ESI-MS (+) spectra were recorded on the Agilent 6546 LC/Q-TOF instrument. Elemental analysis for the compounds was done using a Perkin Elmer series-II CHNS/O analyser 2400. For single crystal X-ray crystallography, the crystal data were collected on a Bruker D8 QUEST CCD diffractometer using graphite-monochromated MoK<sub>α</sub> radiation ( $\lambda = 0.71073 \text{ \AA}$ ) at 293 K. The data integration and reduction were processed with SAINT software<sup>2</sup>, and the data were corrected for absorption by using the SADABS program. The structure was solved by direct methods using the SHELXS program of the SHELXTL package and refined by full-matrix least-squares methods with SHELXL-2014. All the hydrogen atoms were included in idealized positions, and a riding model was used. Non-hydrogen atoms were refined with anisotropic displacement parameters. All the cycloaddition reactions were performed in a Schlenk tube attached to CO<sub>2</sub>-filled balloons (Table 1, entry 1-13). The other small-scale reactions were performed in the Parr reactor with small autoclave vessels (Table 1, entry 14-19), whereas large-scale reactions were performed using a stir tank autoclave reactor (Table 1, entry 20-25). Microbalance sartorius CPA225D was used for weighing.

### **Preparation of [Co( $\kappa$ CN-IMepyO)<sub>3</sub>] (2)**

**[Co( $\kappa$ CN-IMepyO)<sub>3</sub>] (2)**: **1** (0.317 g, 1.5 mmol), CoBr<sub>2</sub> (0.109 g, 0.5 mmol), and K<sub>2</sub>CO<sub>3</sub> (0.552 g, 4 mmol) were taken in a dry round-bottomed flask and methanol (20 mL) was added to it. The reaction mixture was refluxed for 10 h under open air to provide a yellow-brown coloured suspension. The volatiles were removed under vacuum, and the residue was extracted with dry dichloromethane five times (5 x 50 mL) and filtered using Whatman filter paper, leaving a brown residue. Bright, yellow-colored crystals were obtained upon slow evaporation of concentrated DCM in the air. Yield: 0.155 g, 53%. Anal. Calcd. for C<sub>27</sub>H<sub>35</sub>CoN<sub>9</sub>O<sub>8.5</sub>: C, 47.65; H, 5.18; N, 18.52; Found: C, 47.93; H, 5.01; N, 18.53. ESI-MS calcd. for C<sub>27</sub>H<sub>25</sub>CoN<sub>9</sub>O<sub>3</sub> m/z 582.1412; Found 582.1437 (M+H)<sup>+</sup>. <sup>1</sup>H NMR (CD<sub>3</sub>OD, 400 MHz):  $\delta$  3.06 (s, 9H, N-CH<sub>3</sub>), 6.06 (d, *J* = 4.8 Hz, 3H, Im-H), 7.03 (dd, *J* = 8.4, 5.6 Hz, 3H, py-H), 7.25 (d, *J* = 8.4 Hz, 3H, py-H), 7.39 (d, *J* = 2.4 Hz, 3H, Im-H), 9.13 (d, *J* = 1.6 Hz, 3H, py-H), <sup>13</sup>C NMR (CD<sub>3</sub>OD, 100 MHz):  $\delta$  35.3, 122.2, 125.9, 126.5, 128.3, 133.0, 142.7, 158.3. IR (KBr):  $\tilde{\nu}$  3176 (w), 2920 (w), 2853 (w), 1652 (w), 1583 (w), 1557 (m), 1475 (s), 1443 (s), 1340 (s), 1304 (m), 1280 (m), 1237 (w), 1110 (w), 1082 (w), 960 (w), 880 (w), 790 (w), 733 (w), 661 (m), 592 (m), 470 (w) cm<sup>-1</sup>.

**The procedure of cycloaddition of CO<sub>2</sub> into epoxides:** All catalytic cycloaddition reactions (table 1, entry 1-13) were performed in the Schlenk tube (10 mL). The catalyst (**2**) and cocatalyst (TBAB) were placed in the Schlenk tube and evacuated for 15 min. Epoxide (10 mmol; 0.78 mL) was added to the reaction mixture and stirred for 5 min. The Schlenk tube was sealed with a septum, and carbon dioxide gas was purged using a balloon into the mixture for an appropriate time specified in Table 1 or Figure 2. Upon completion of the reaction, the reaction mixture was cooled to RT. Before purification (isolation) of the final product, the completion of the reaction was monitored by the <sup>1</sup>H NMR spectroscopy. Subsequently, the

ethyl acetate (5 mL) was added to the product, and the solution was filtered using a small silica pad to obtain the pure products of **4a**, **4d**, and **4h** (Figure S4-S19). For all the other compounds, a slurry of crude reaction mixture made using SiO<sub>2</sub> was transferred to column chromatography, and the desired COC was separated using the eluent (see characterization of COC).

*Large-scale reactions* (entry 20-25): The procedure which is described is for entry 24 and it is applicable to all the other entries from 20-25 except the catalyst **2** concentration was taken as mentioned in the Table 1 and appropriate quantities of TBAB was calculated. In a parr reactor autoclave (100 mL), catalyst **2** (0.408 mg, 0.0006 mmol), TBAB (257.8 mg, 0.8 mmol), and ECH (31.3 mL, 400 mmol) were taken. The reactor was charged and vented with CO<sub>2</sub> three times. The reaction was stirred for 24 h at 100 °C and 1 atm pressure. After completion of the reaction, it was cooled down to room temperature. The <sup>1</sup>H NMR spectrum of crude sample was recorded and the conversion to COC was calculated.

**Reusability of the catalyst:** ECH (0.78 mL, 10 mmol) was placed in a Schlenk tube with **2** (2.9 mg, 0.0043 mmol) and TBAB (6.44 mg, 0.02 mmol) at 100 °C and 1 atm pressure (Table 1, entry 11). After the reaction was completed in 3 h, fresh ECH (10 mmol) was added to the same mixture, and the reaction continued for a further 3 h. Likewise, the process was repeated five times.

## Crystallographic Tables

**Table S1:** Crystal data and structure refinement for Co(III)-NHC complex, **2·5.5 H<sub>2</sub>O**

|                                                              |                                                                                            |
|--------------------------------------------------------------|--------------------------------------------------------------------------------------------|
| Identification code                                          | 2368776 (3sepb_0m)                                                                         |
| Empirical formula                                            | C <sub>27</sub> H <sub>35</sub> CoN <sub>9</sub> O <sub>8.5</sub> (2·5.5 H <sub>2</sub> O) |
| Formula weight                                               | 679.56                                                                                     |
| Temperature/K                                                | 273.15                                                                                     |
| Crystal system                                               | monoclinic                                                                                 |
| Space group                                                  | <i>P</i> 2 <sub>1</sub> / <i>n</i>                                                         |
| <i>a</i> /Å                                                  | 8.5150(6)                                                                                  |
| <i>b</i> /Å                                                  | 17.8418(12)                                                                                |
| <i>c</i> /Å                                                  | 19.7536(14)                                                                                |
| $\alpha$ /°                                                  | 90                                                                                         |
| $\beta$ /°                                                   | 96.895(2)                                                                                  |
| $\gamma$ /°                                                  | 90                                                                                         |
| Volume /Å <sup>3</sup>                                       | 2979.3(4)                                                                                  |
| <i>Z</i>                                                     | 4                                                                                          |
| $\rho_{\text{calc}}$ g/cm <sup>3</sup>                       | 1.517                                                                                      |
| $\mu$ /mm <sup>-1</sup>                                      | 0.644                                                                                      |
| <i>F</i> (000)                                               | 1420.0                                                                                     |
| Crystal size/mm <sup>3</sup>                                 | 0.2 × 0.18 × 0.16                                                                          |
| Radiation                                                    | MoK $\alpha$ ( $\lambda$ = 0.71073)                                                        |
| 2 $\theta$ range for data collection /°                      | 5.014 to 50.1                                                                              |
| Index ranges                                                 | -10 ≤ <i>h</i> ≤ 10, -21 ≤ <i>k</i> ≤ 21, -23 ≤ <i>l</i> ≤ 23                              |
| Reflections collected                                        | 21547                                                                                      |
| Independent reflections                                      | 5267 [ <i>R</i> <sub>int</sub> = 0.0995, <i>R</i> <sub>sigma</sub> = 0.1123]               |
| Data/restraints/parameters                                   | 5267/0/434                                                                                 |
| Goodness-of-fit on <i>F</i> <sup>2</sup>                     | 1.028                                                                                      |
| Final <i>R</i> indexes [ <i>I</i> ≥ 2 $\sigma$ ( <i>I</i> )] | <i>R</i> <sub>1</sub> = 0.0718, <i>wR</i> <sub>2</sub> = 0.1377                            |
| Final <i>R</i> indexes [all data]                            | <i>R</i> <sub>1</sub> = 0.1351, <i>wR</i> <sub>2</sub> = 0.1592                            |

**Table S2: Bond Lengths for 2·5.5 H<sub>2</sub>O**

| Atom | Atom | Length/Å |  | Atom | Atom            | Length/Å |
|------|------|----------|--|------|-----------------|----------|
| Co1  | N6   | 1.959(4) |  | N8   | C19             | 1.344(6) |
| Co1  | N9   | 1.987(4) |  | N8   | C27             | 1.455(6) |
| Co1  | N3   | 1.953(4) |  | N4   | C10             | 1.344(6) |
| Co1  | C19  | 1.940(5) |  | N4   | C18             | 1.448(6) |
| Co1  | C1   | 1.931(5) |  | N4   | C11             | 1.380(7) |
| Co1  | C10  | 1.886(5) |  | C22  | C23             | 1.425(7) |
| O2   | C23  | 1.280(5) |  | N2   | C1              | 1.337(6) |
| O1   | C5   | 1.307(6) |  | N2   | C2              | 1.392(6) |
| O3   | C14  | 1.281(6) |  | N2   | C9              | 1.469(6) |
| N6   | C17  | 1.351(6) |  | C16  | C17             | 1.369(7) |
| N6   | C13  | 1.337(6) |  | C16  | C15             | 1.368(7) |
| N9   | C22  | 1.332(6) |  | C23  | C24             | 1.404(7) |
| N9   | C26  | 1.353(6) |  | C21  | C20             | 1.347(7) |
| N3   | C4   | 1.348(6) |  | C4   | C5              | 1.401(7) |
| N3   | C8   | 1.345(6) |  | C26  | C25             | 1.380(7) |
| N7   | C22  | 1.406(6) |  | C13  | C14             | 1.417(7) |
| N7   | C21  | 1.396(6) |  | C15  | C14             | 1.418(7) |
| N7   | C19  | 1.352(6) |  | C24  | C25             | 1.364(7) |
| N1   | C4   | 1.417(6) |  | C12  | C11             | 1.335(7) |
| N1   | C1   | 1.376(6) |  | C5   | C6              | 1.397(7) |
| N1   | C3   | 1.384(6) |  | C8   | C7              | 1.360(7) |
| N5   | C13  | 1.407(6) |  | C3   | C2              | 1.337(7) |
| N5   | C10  | 1.351(6) |  | C6   | C7              | 1.335(7) |
| N5   | C12  | 1.379(6) |  | O5   | O5 <sup>1</sup> | 1.39(3)  |
| N8   | C20  | 1.389(6) |  |      |                 |          |

<sup>1</sup>-X,-Y,1-Z

**Table S3: Bond Angles (°) for 2·5.5 H<sub>2</sub>O**

| Atom | Atom | Atom | Angle/°    | Atom | Atom | Atom | Angle/°  |
|------|------|------|------------|------|------|------|----------|
| N6   | Co1  | N9   | 93.86(16)  | C1   | N2   | C2   | 110.6(4) |
| N3   | Co1  | N6   | 175.99(16) | C1   | N2   | C9   | 126.8(5) |
| N3   | Co1  | N9   | 89.11(16)  | C2   | N2   | C9   | 122.6(4) |
| C19  | Co1  | N6   | 89.25(18)  | C15  | C16  | C17  | 121.4(5) |
| C19  | Co1  | N9   | 81.50(19)  | N6   | C17  | C16  | 120.3(5) |
| C19  | Co1  | N3   | 93.86(18)  | O2   | C23  | C22  | 121.6(5) |
| C1   | Co1  | N6   | 94.97(18)  | O2   | C23  | C24  | 125.7(5) |
| C1   | Co1  | N9   | 96.75(18)  | C24  | C23  | C22  | 112.7(4) |
| C1   | Co1  | N3   | 81.99(18)  | C20  | C21  | N7   | 105.3(4) |
| C1   | Co1  | C19  | 175.5(2)   | N3   | C4   | N1   | 111.8(4) |
| C10  | Co1  | N6   | 82.35(19)  | N3   | C4   | C5   | 124.5(5) |
| C10  | Co1  | N9   | 175.10(19) | C5   | C4   | N1   | 123.6(5) |
| C10  | Co1  | N3   | 94.83(19)  | C21  | C20  | N8   | 108.3(4) |
| C10  | Co1  | C19  | 95.3(2)    | N7   | C19  | Co1  | 112.2(3) |
| C10  | Co1  | C1   | 86.7(2)    | N8   | C19  | Co1  | 141.8(4) |
| C17  | N6   | Co1  | 126.9(4)   | N8   | C19  | N7   | 106.0(4) |
| C13  | N6   | Co1  | 114.8(3)   | N9   | C26  | C25  | 120.1(5) |
| C13  | N6   | C17  | 118.3(4)   | N1   | C1   | Co1  | 112.4(3) |
| C22  | N9   | Co1  | 114.9(3)   | N2   | C1   | Co1  | 143.0(4) |
| C22  | N9   | C26  | 119.0(4)   | N2   | C1   | N1   | 104.3(4) |
| C26  | N9   | Co1  | 126.0(3)   | N6   | C13  | N5   | 111.6(4) |
| C4   | N3   | Co1  | 115.9(3)   | N6   | C13  | C14  | 126.1(4) |
| C8   | N3   | Co1  | 126.3(4)   | N5   | C13  | C14  | 122.3(5) |
| C8   | N3   | C4   | 117.8(4)   | N5   | C10  | Co1  | 113.2(3) |
| C21  | N7   | C22  | 130.3(4)   | N4   | C10  | Co1  | 141.2(4) |
| C19  | N7   | C22  | 118.8(4)   | N4   | C10  | N5   | 105.6(4) |
| C19  | N7   | C21  | 110.8(4)   | C16  | C15  | C14  | 121.0(5) |
| C1   | N1   | C4   | 117.2(4)   | O3   | C14  | C13  | 122.3(5) |
| C1   | N1   | C3   | 111.3(4)   | O3   | C14  | C15  | 124.8(5) |
| C3   | N1   | C4   | 131.3(5)   | C13  | C14  | C15  | 112.8(5) |
| C10  | N5   | C13  | 117.9(4)   | C25  | C24  | C23  | 122.5(5) |
| C10  | N5   | C12  | 110.8(4)   | C24  | C25  | C26  | 120.2(5) |
| C12  | N5   | C13  | 131.2(4)   | C11  | C12  | N5   | 105.9(5) |
| C20  | N8   | C27  | 122.5(4)   | O1   | C5   | C4   | 121.0(5) |
| C19  | N8   | C20  | 109.6(4)   | O1   | C5   | C6   | 124.7(5) |
| C19  | N8   | C27  | 127.7(4)   | C6   | C5   | C4   | 114.3(5) |
| C10  | N4   | C18  | 128.6(4)   | N3   | C8   | C7   | 120.7(5) |
| C10  | N4   | C11  | 109.4(4)   | C2   | C3   | N1   | 105.7(5) |
| C11  | N4   | C18  | 122.0(4)   | C7   | C6   | C5   | 121.2(5) |
| N9   | C22  | N7   | 112.2(4)   | C3   | C2   | N2   | 108.0(5) |
| N9   | C22  | C23  | 125.3(4)   | C12  | C11  | N4   | 108.4(5) |
| N7   | C22  | C23  | 122.5(4)   | C6   | C7   | C8   | 121.5(5) |

## Characterization of **2**:

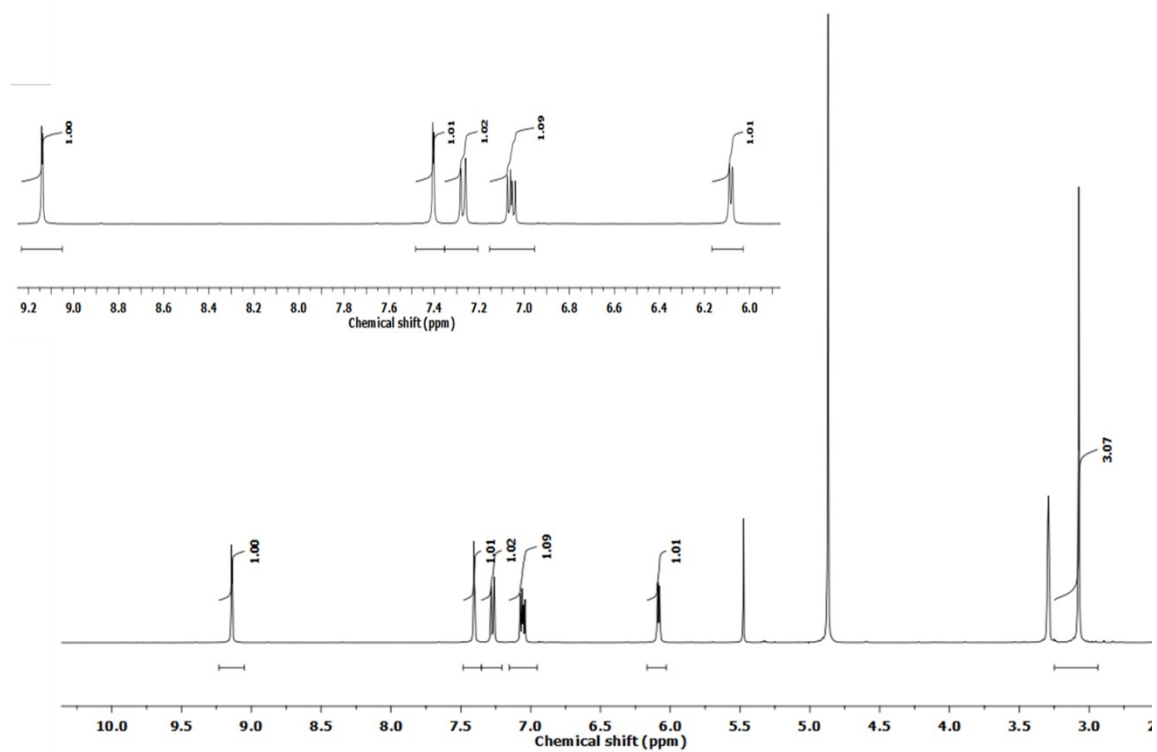

**Fig. S1a.**  $^1\text{H}$  NMR spectrum of **2** ( $\text{CD}_3\text{OD}$ )

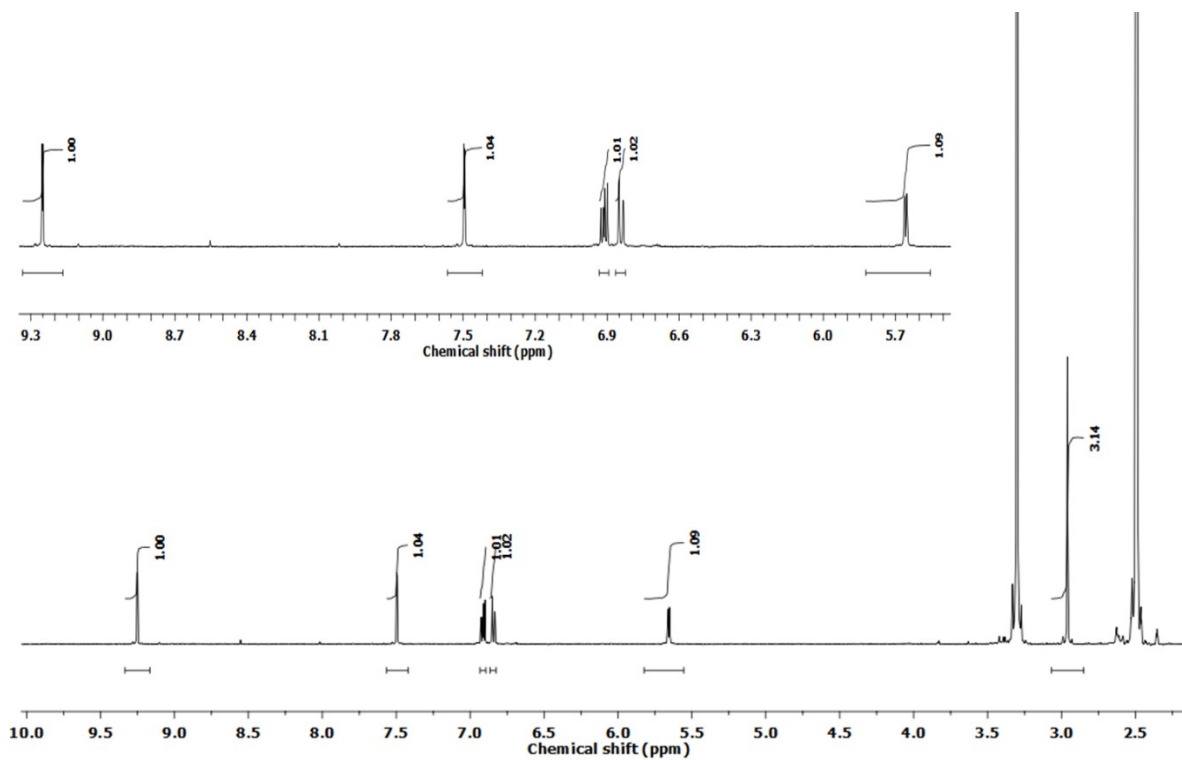

**Fig. S1b.**  $^1\text{H}$  NMR spectrum of **2** ( $\text{DMSO}-d_6$ )

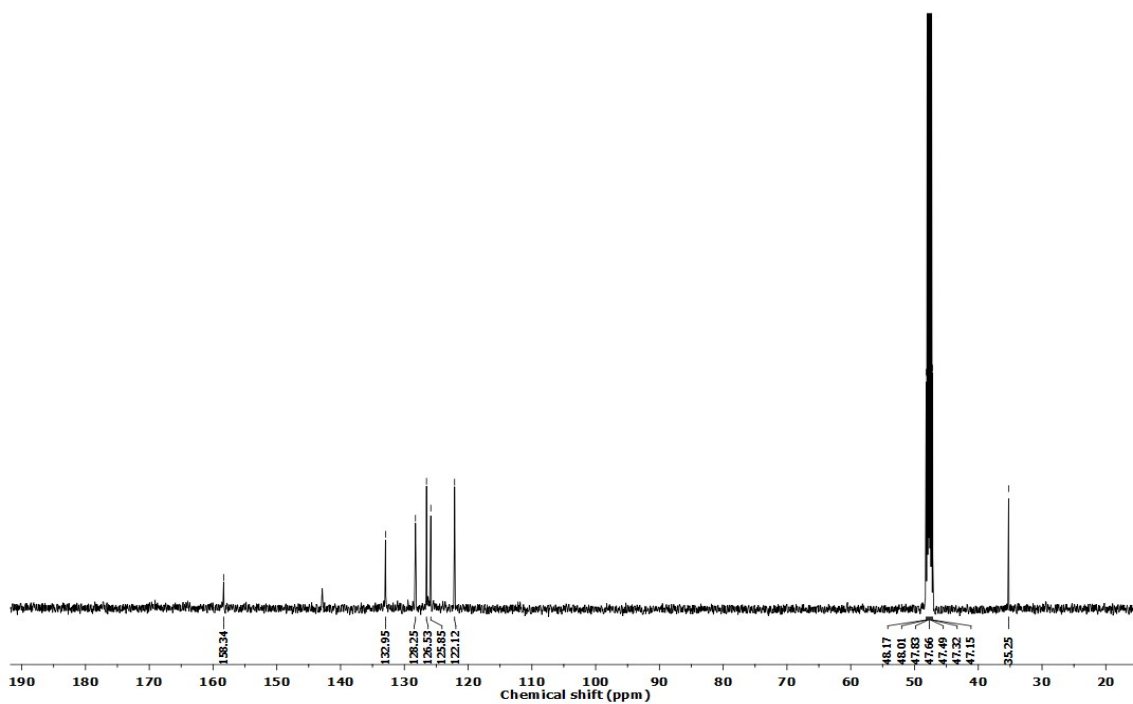

Fig. S2.  $^{13}\text{C}$  NMR spectrum of **2** ( $\text{CD}_3\text{OD}$ )

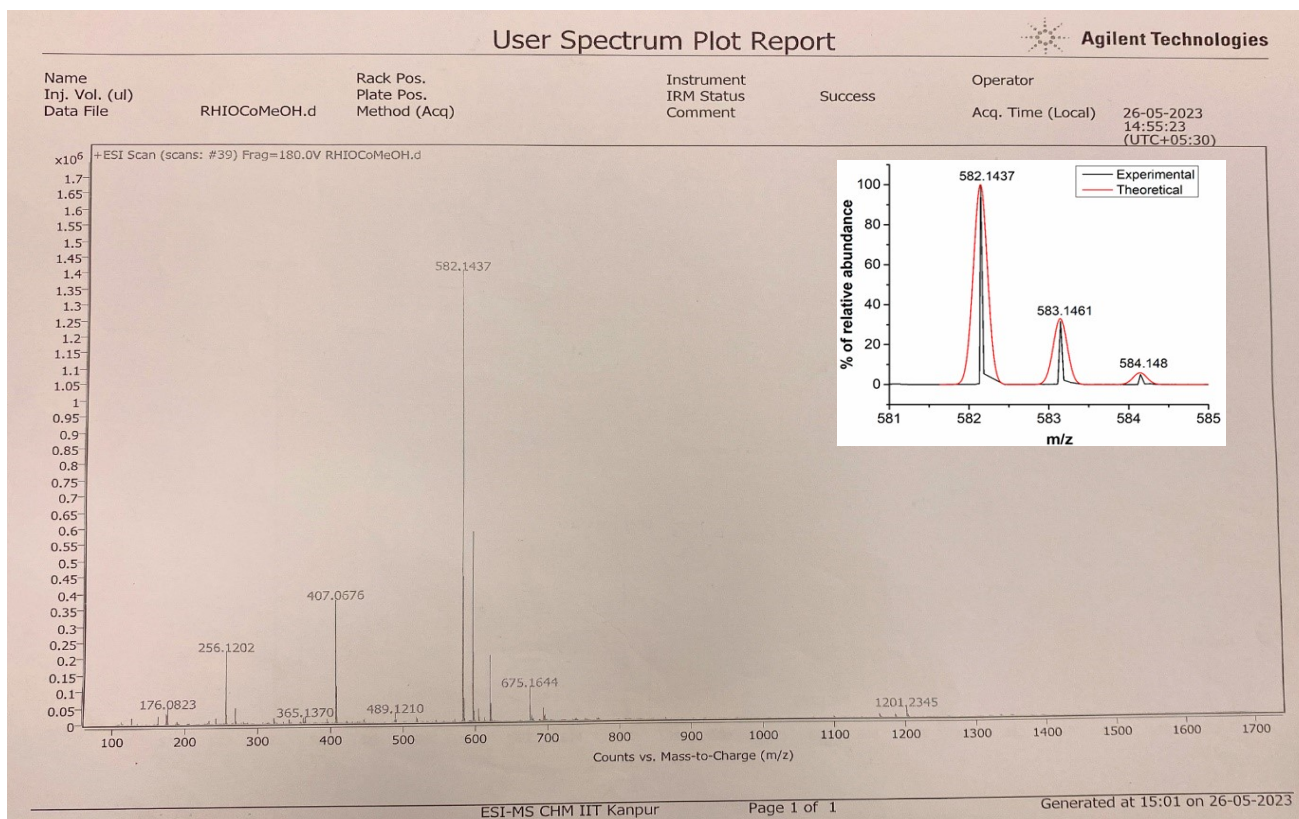



**Fig. S3.** ESI-MS(+) spectrum of **2**

## Characterization of COC: [3-16]

### 4-(chloromethyl)-1,3-dioxolan-2-one (4a):

The pale-yellow coloured liquid was obtained. <sup>1</sup>H NMR (CDCl<sub>3</sub>, 400 MHz): δ 5.00 – 4.94 (m, 1H, OCH), 4.60-4.56 (t, 1H, OCH<sub>2</sub>), 4.41-4.37 (t, 1H, OCH<sub>2</sub>), 3.81-3.69 (m, 2H, -CH<sub>2</sub>Cl). <sup>13</sup>C NMR (CDCl<sub>3</sub>, 100 MHz): δ 154.8, 78.9, 74.6, 44.0.

### 4-butyl-1,3-dioxolan-2-one (4b):

The pale-yellow coloured liquid was obtained by purification through column chromatography (5:1 hexane/ethyl acetate as an eluent). <sup>1</sup>H NMR (CDCl<sub>3</sub>, 400 MHz): δ 4.69-4.63 (m, 1H, CHO), 4.50-4.47 (t, 1H, OCH<sub>2</sub>), 4.04-4.01 (t, 1H, OCH<sub>2</sub>), 1.75- 1.64 (m, 2H, CH<sub>2</sub>), 1.41-1.32 (m, 4H, CH<sub>2</sub>), 0.90- 0.86 (t, 3H, CH<sub>3</sub>). <sup>13</sup>C NMR (CDCl<sub>3</sub>, 100 MHz): δ 155.2, 77.2, 69.5, 33.2, 26.2, 22.3, 13.8.

### 4-(phenoxyethyl)-1,3-dioxolan-2-one (4c):

Colourless solid were obtained by column chromatography. (3:2 hexane/ethyl acetate as an eluent) <sup>1</sup>H NMR (CDCl<sub>3</sub>, 400 MHz): δ 7.31-7.21 (t, 2H, *m*-Ph), 7.00 (t, 1H, *p*-Ph), 6.88 (d, 2H, *o*-Ph), 5.00-4.98 (m, 1H, OCH), 4.61-4.54 (m, 2H, OCH<sub>2</sub>), 4.23 (dd, 1H, CH<sub>2</sub>), 4.20 (dd, 1H, CH<sub>2</sub>). <sup>13</sup>C NMR (CDCl<sub>3</sub>, 100 MHz): δ 158.2, 154.6, 129.6, 121.9, 115.4, 77.5, 73.9, 67.0.

### 4-methyl-1,3-dioxolan-2-one (4d):

A colourless and odourless liquid was obtained, <sup>1</sup>H NMR (CDCl<sub>3</sub>, 400 MHz): δ 4.83 (d, 1H), 4.62 – 4.48 (m, 1H), 3.98 (dd, 1H), 1.47 (d, 3H). <sup>13</sup>C NMR (CDCl<sub>3</sub>, 100 MHz): δ 155.2, 73.6, 70.9, 19.5.

### 4-phenyl-1,3-dioxolan-2-one (4e):

Colourless solid was obtained, through column chromatography. (3:1 hexane/ethyl acetate as an eluent) <sup>1</sup>H NMR (CDCl<sub>3</sub>, 400 MHz): δ 7.48- 7.16 (m, 5H, Ph), 5.64 (t, 1H, OCH), 4.78 (t, 1H, CH<sub>2</sub>), 4.36 (t, 1H, CH<sub>2</sub>). <sup>13</sup>C NMR (CDCl<sub>3</sub>, 100 MHz): δ 154.5, 135.8, 129.8, 128.9, 76.2, 71.4.

### hexahydro-1,3-benzodioxol-2-one (4f):

Pale-yellow coloured liquid was obtained column chromatography. (3:1 hexane/ethyl acetate as an eluent) <sup>1</sup>H NMR (CDCl<sub>3</sub>, 400 MHz): δ 4.65 (m, 2H, OCHCH<sub>2</sub>), 1.91-1.84 (m, 4H, OCHCH<sub>2</sub>), 1.53 (m, 2H, CH<sub>2</sub>), 1.39 (m, 2H, CH<sub>2</sub>). <sup>13</sup>C NMR (CDCl<sub>3</sub>, 100 MHz): δ 155.1, 75.5, 27.2, 19.3.

### 4-((allyloxy)methyl)-1,3-dioxolan-2-one (4g):

A pale-yellow coloured liquid was obtained in column chromatography. (3:1 hexane/ethyl acetate as an eluent) <sup>1</sup>H NMR (CDCl<sub>3</sub>, 400 MHz): δ 5.85-5.76 (m, 1H, CH), 5.24- 5.20 (d, 1H, CH), 5.16-5.14 (d, 1H, CH), 4.80- 4.75 (m, 1H, CH), 4.47- 4.43 (t, 1H, CH<sub>2</sub>), 4.35-4.31 (t, 1H, CH<sub>2</sub>), 3.98 (s, 2H, CH), 3.66-3.53 (dd, 2H, CH<sub>2</sub>). <sup>13</sup>C NMR (CDCl<sub>3</sub>, 100 MHz): δ 155.0, 134.2, 117.5, 75.3, 72.0, 68.9, 66.03.

### 4,4'-[(((2,2-dimethylpropane-1,3-diyl)bis(oxy))bis(methylene))bis(1,3-dioxolan-2-one)] (4h):

The pale green coloured liquid was obtained, <sup>1</sup>H NMR (CDCl<sub>3</sub>, 400 MHz): δ 4.84 – 4.75 (m, 1H, CH), 4.50 – 4.34 (m, 2H, CH<sub>2</sub>), 3.70-3.52 (m, 2H, CH<sub>2</sub>), 3.34-3.17 (m, 2H, CH<sub>2</sub>), 0.89-

0.76 (s, 3H, CH<sub>3</sub>). <sup>13</sup>C NMR (CDCl<sub>3</sub>, 100 MHz): δ 155.2, 79.5, 78.8, 77.3, 76.9, 75.4, 70.4, 70.2, 66.3, 44.2, 43.9, 36.3, 22.0.

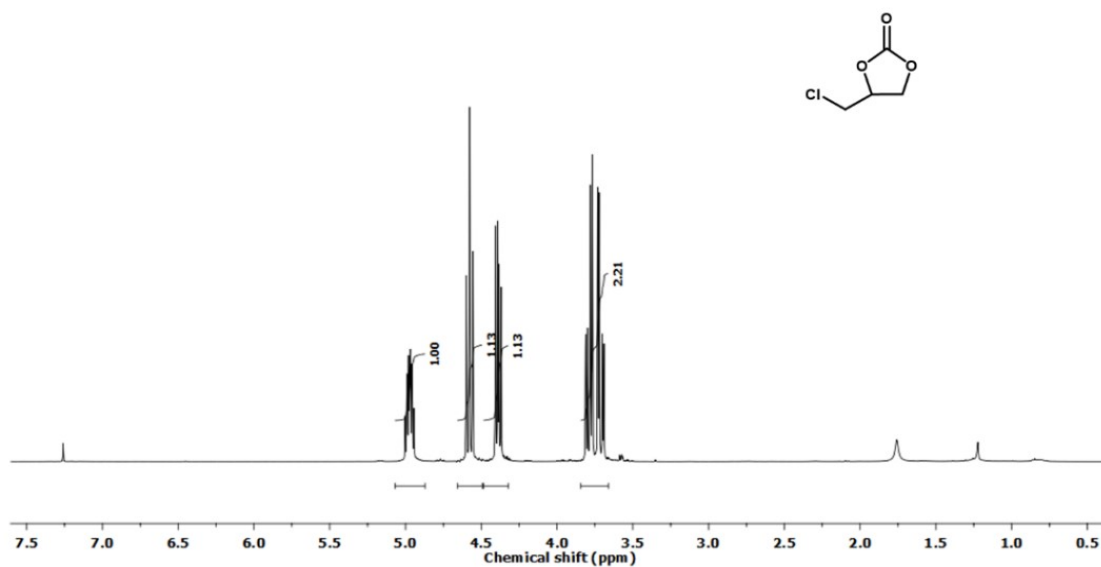

**Figure S4:** <sup>1</sup>H NMR spectrum of 4-(chloromethyl)-1,3-dioxolan-2-one (**4a**).

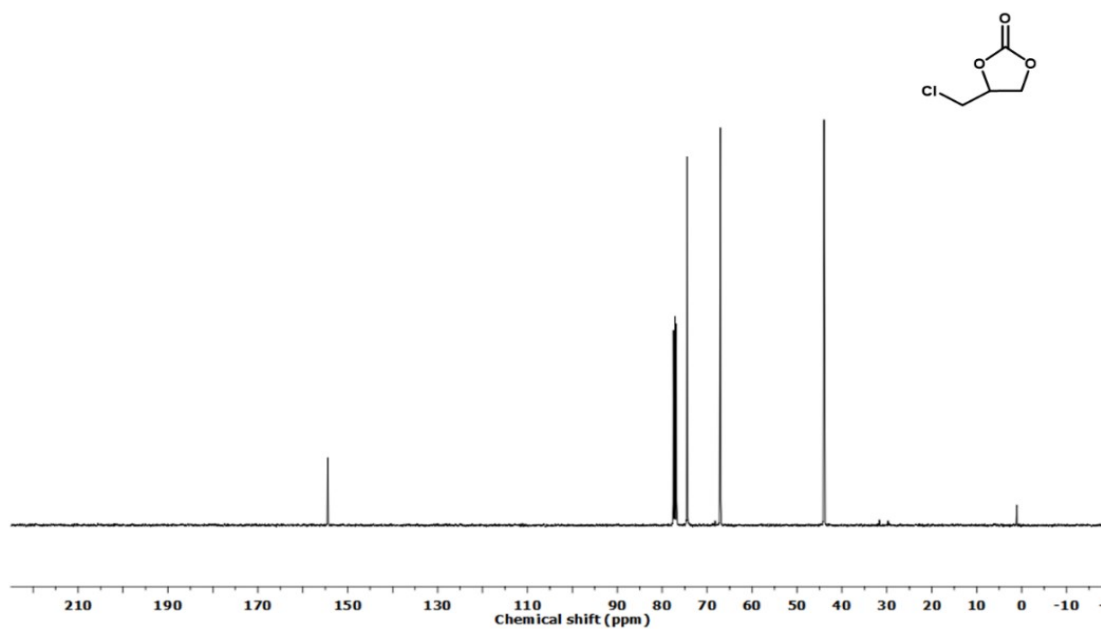

**Figure S5:** <sup>13</sup>C NMR spectrum of 4-(chloromethyl)-1,3-dioxolan-2-one (**4a**).

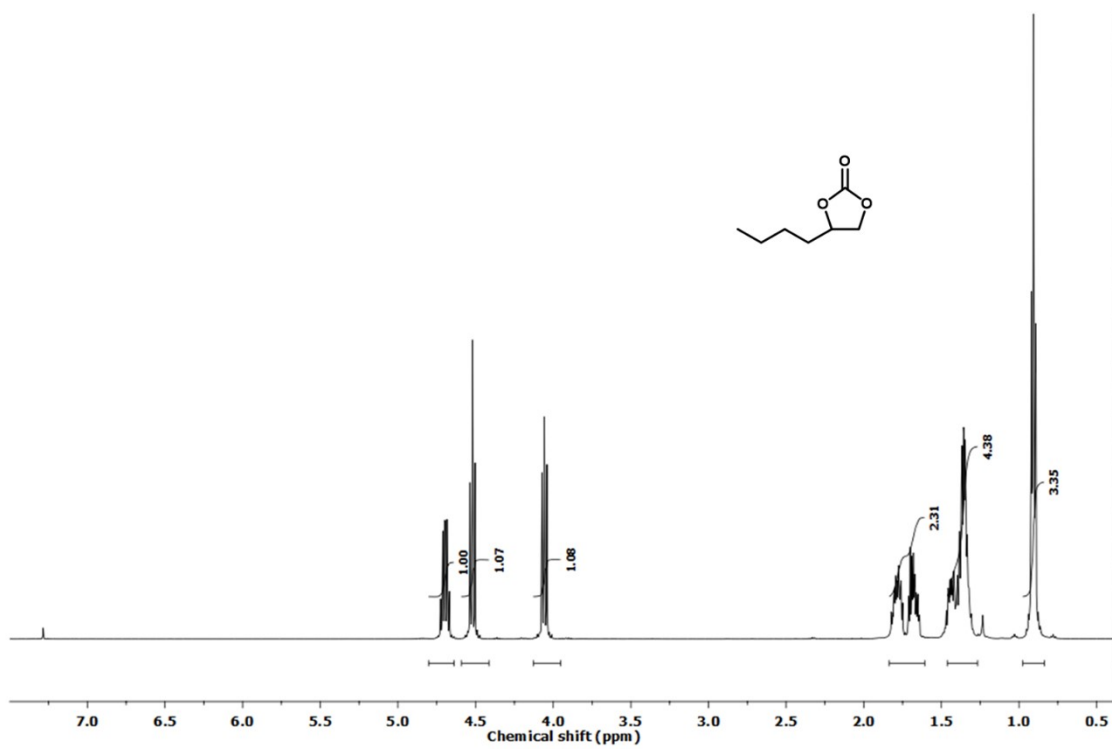

**Figure S6:**  $^1\text{H}$  NMR spectrum of 4-butyl-1,3-dioxolan-2-one (**4b**).

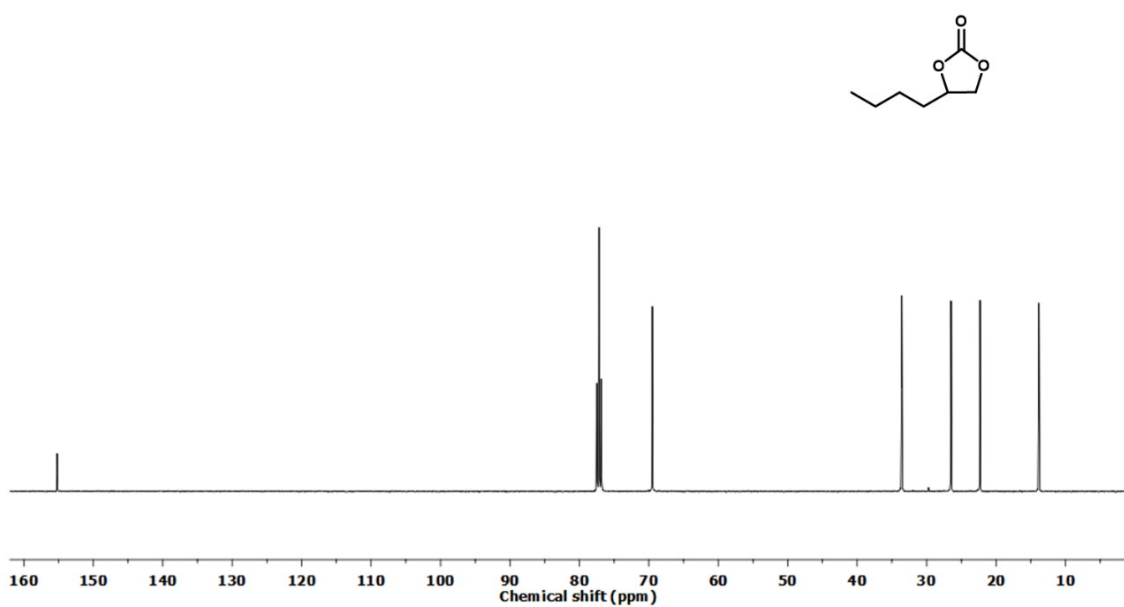

**Figure S7:**  $^{13}\text{C}$  NMR spectrum of 4-butyl-1,3-dioxolan-2-one (**4b**).

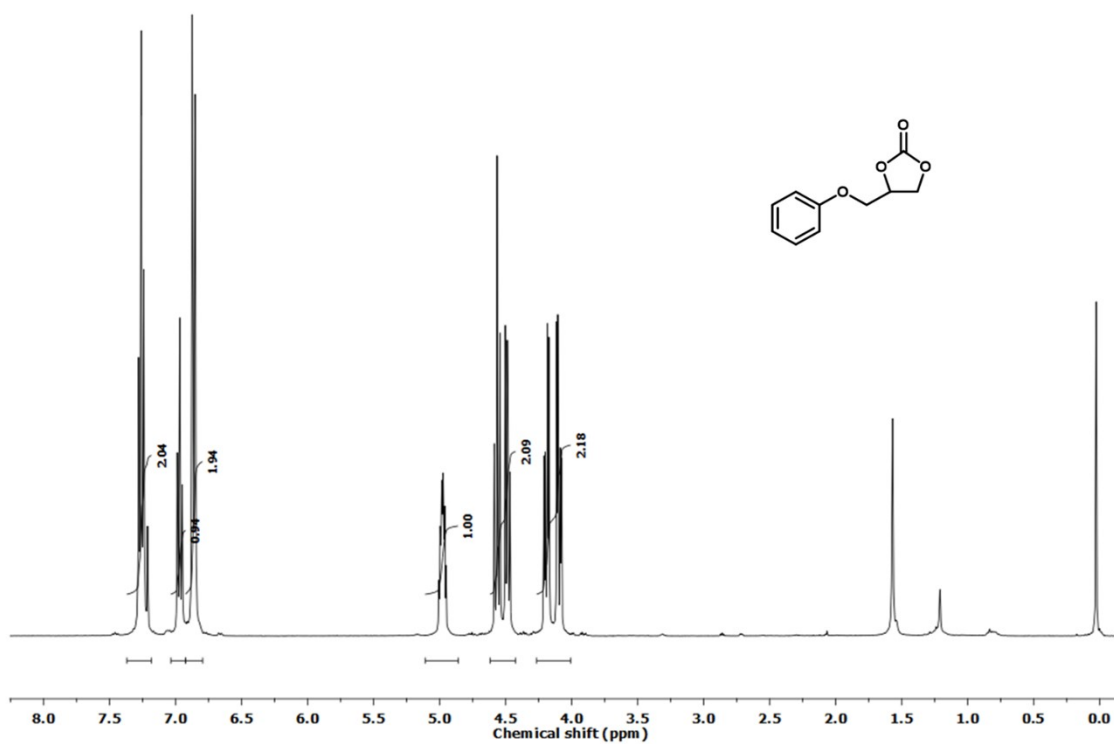

**Figure S8:**  $^1\text{H NMR}$  spectrum of 4-(phenoxyethyl)-1,3-dioxolan-2-one (4c).

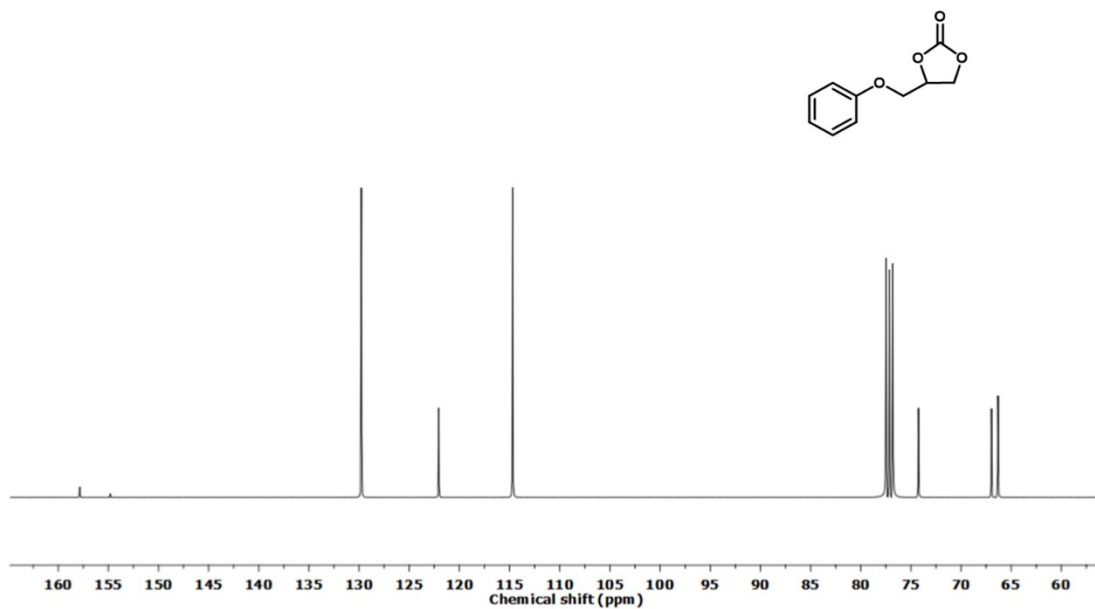

**Figure S9:**  $^{13}\text{C NMR}$  spectrum of pure 4-(phenoxyethyl)-1,3-dioxolan-2-one (4c).

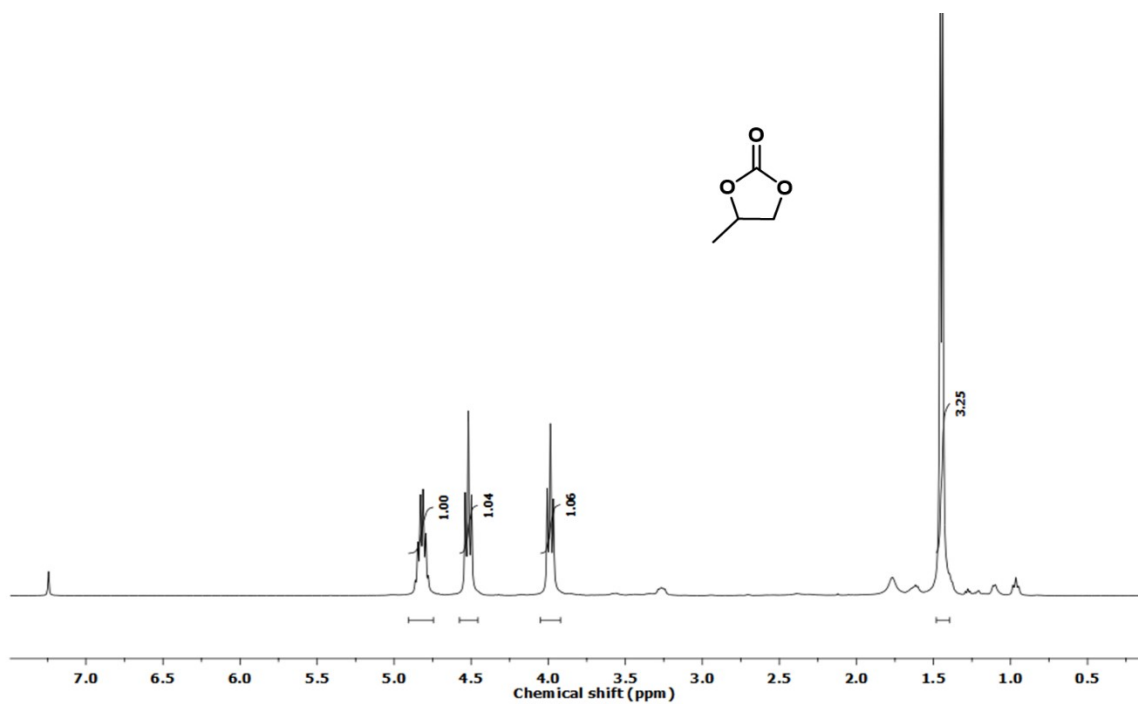

**Figure S10:**  $^1\text{H}$  NMR spectrum of 4-methyl-1,3-dioxolan-2-one (**4d**).

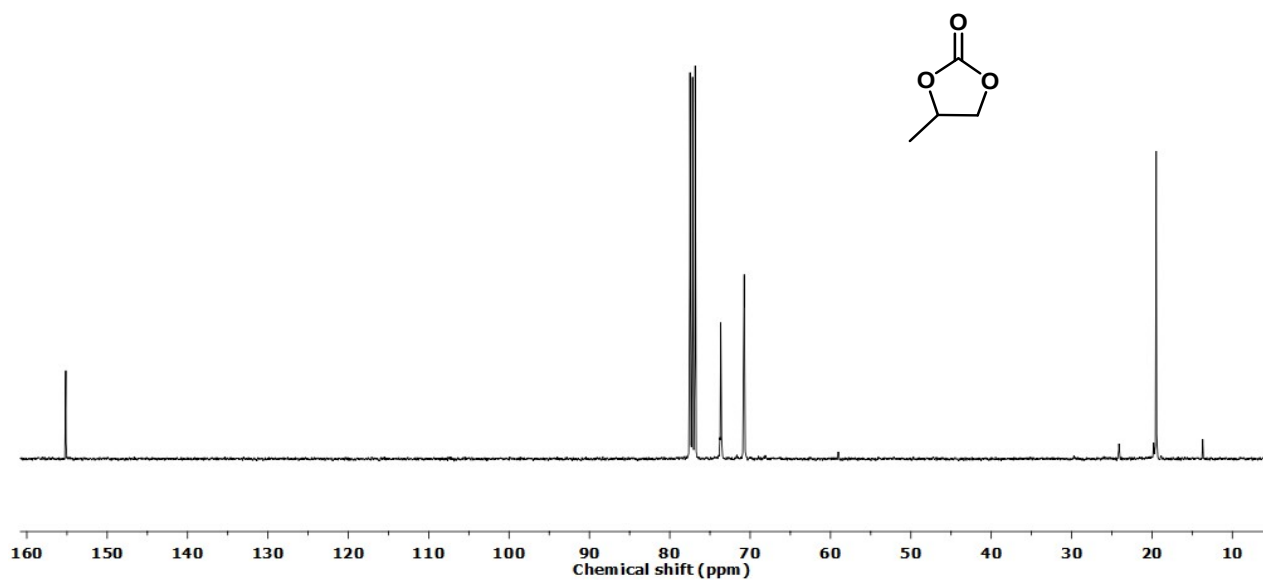

**Figure S11:**  $^{13}\text{C}$  NMR spectrum of 4-methyl-1,3-dioxolan-2-one (**4d**).

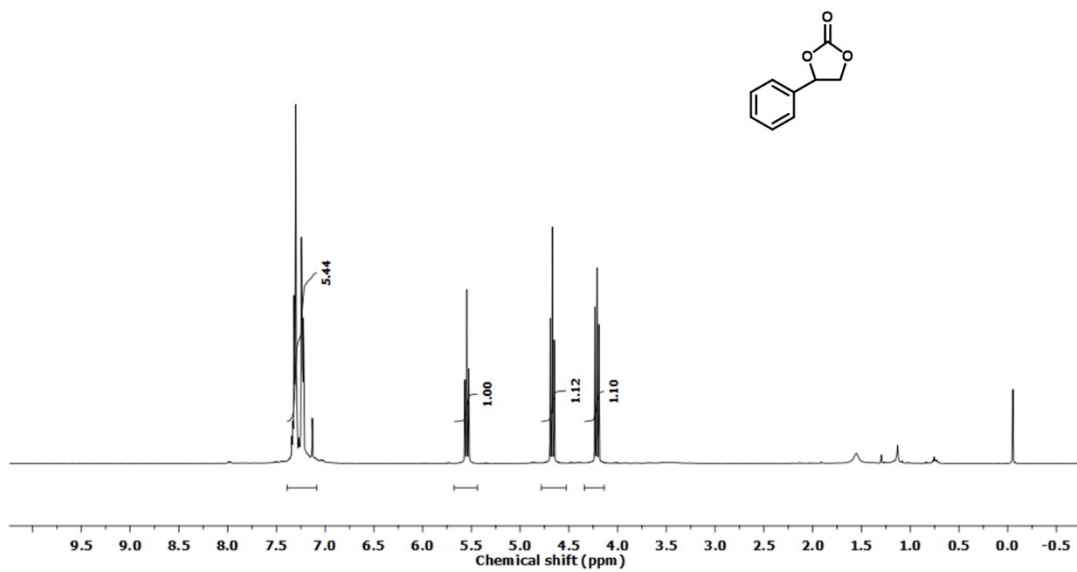

**Figure S12:**  $^1\text{H}$  NMR spectrum of 4-phenyl-1,3-dioxolan-2-one (4e).

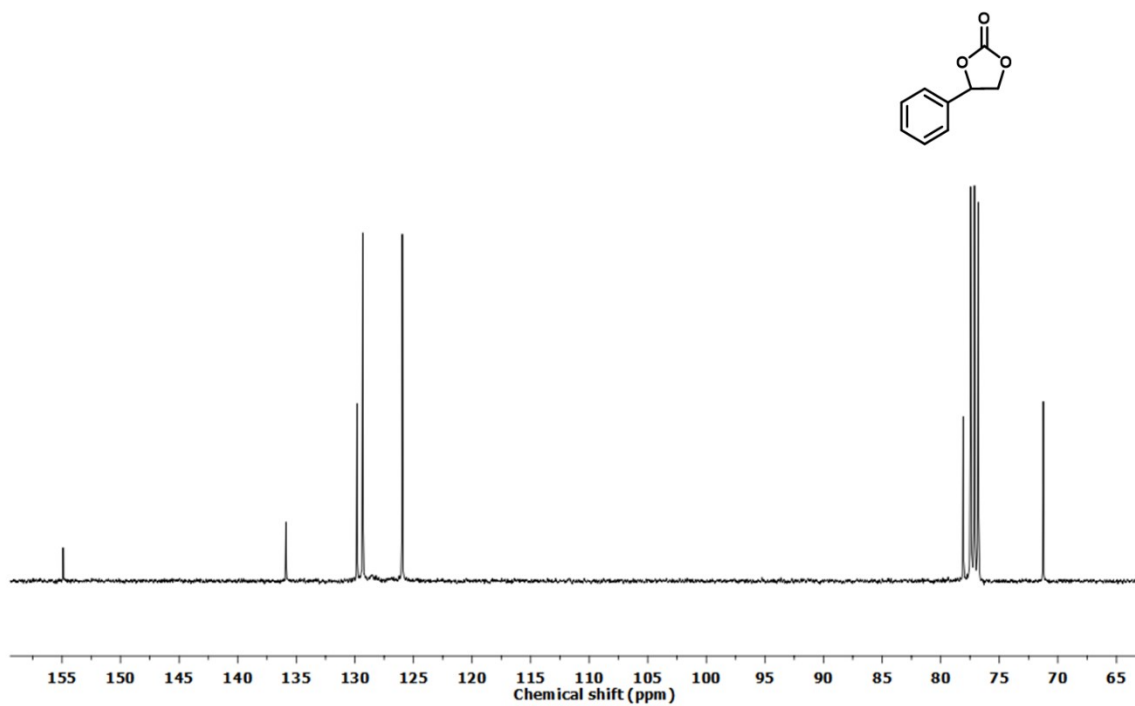

**Figure S13:**  $^{13}\text{C}$  NMR spectrum of 4-phenyl-1,3-dioxolan-2-one (4e).

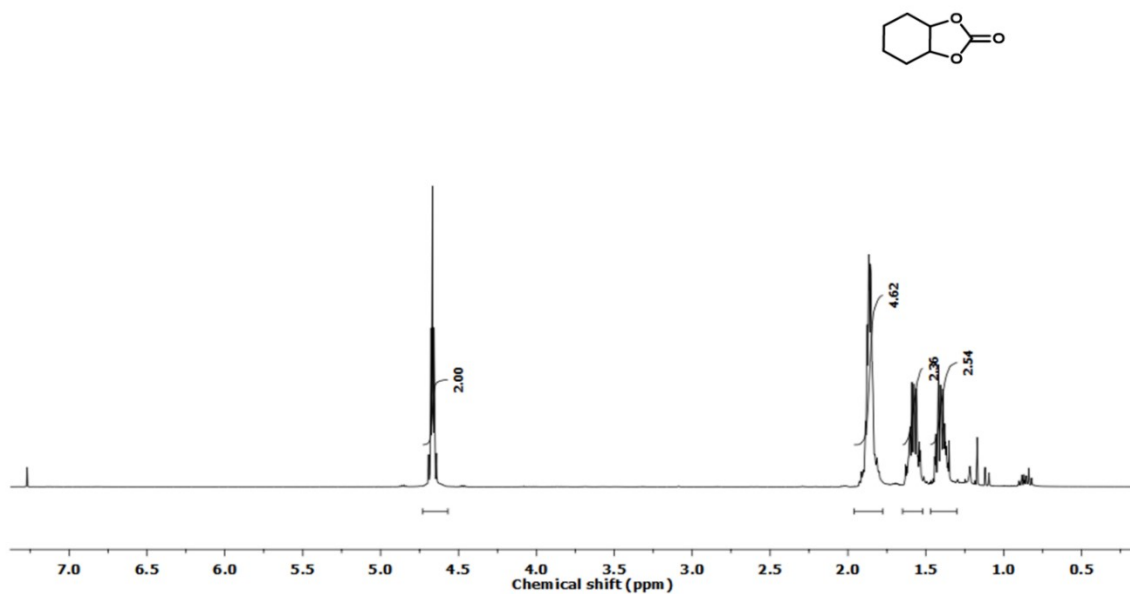

**Figure S14:** <sup>1</sup>H NMR spectrum of hexahydro-1,3-benzodioxol-2-one (4f).

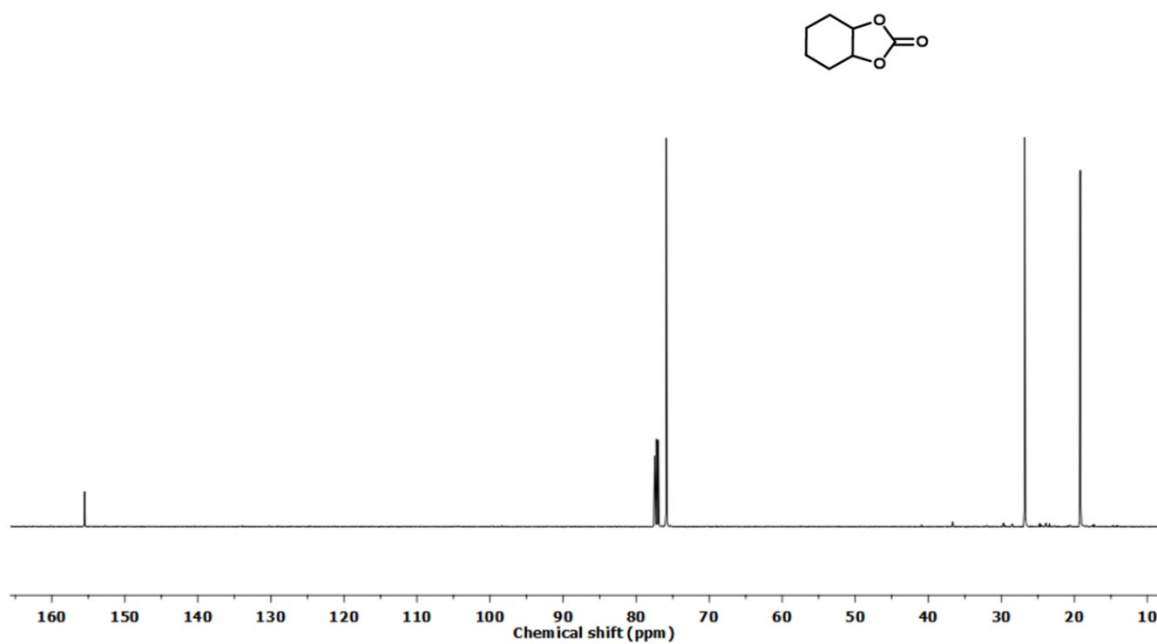

**Figure S15:** <sup>13</sup>C NMR spectrum of hexahydro-1,3-benzodioxol-2-one (4f).



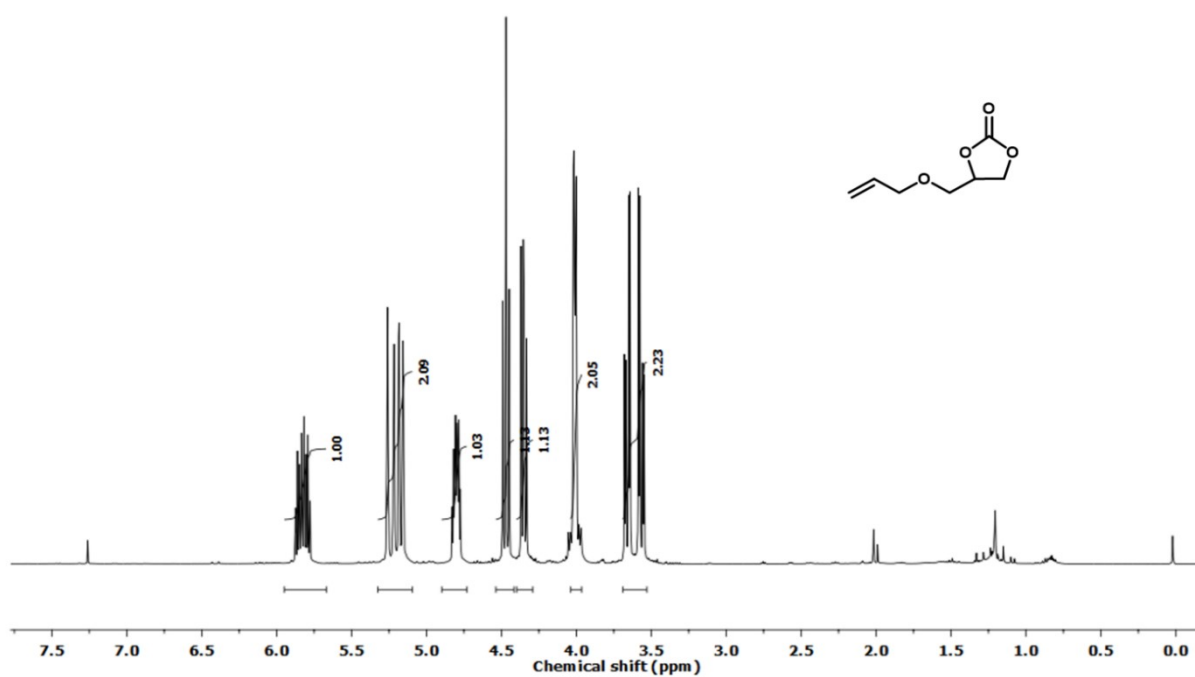

**Figure S16:** <sup>1</sup>H NMR spectrum of 4-((allyloxy)methyl)-1,3-dioxolan-2-one (**4g**).

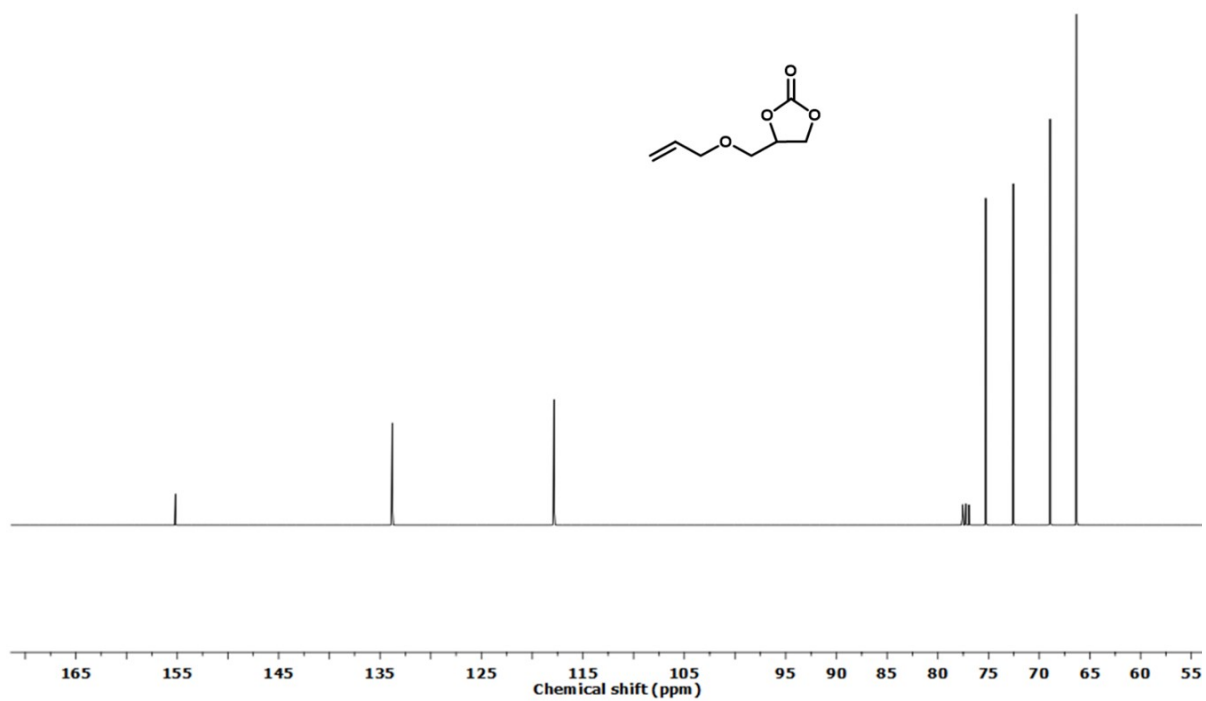

**Figure S17:** <sup>13</sup>C NMR spectra of 4-((allyloxy)methyl)-1,3-dioxolan-2-one (**4g**).

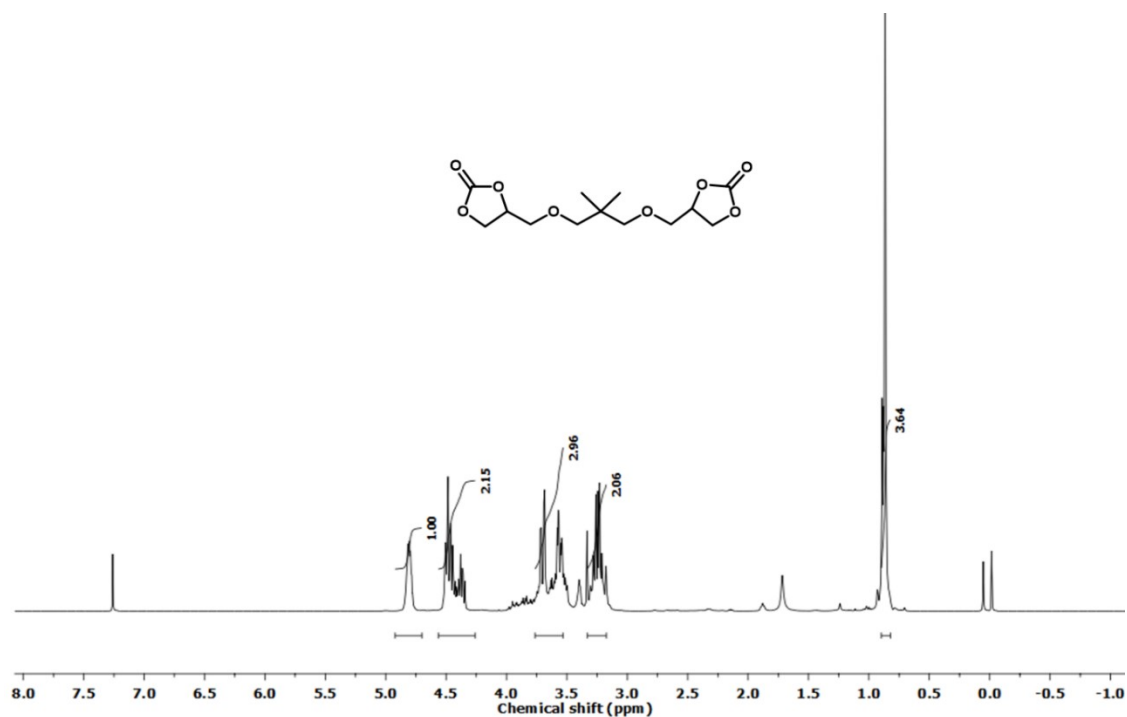

**Figure S18:**  $^1\text{H}$  NMR spectrum of 4,4'-(((2,2-dimethylpropane-1,3-diyl)bis(oxy))bis(methylene))bis(1,3-dioxolan-2-one) (**4h**).

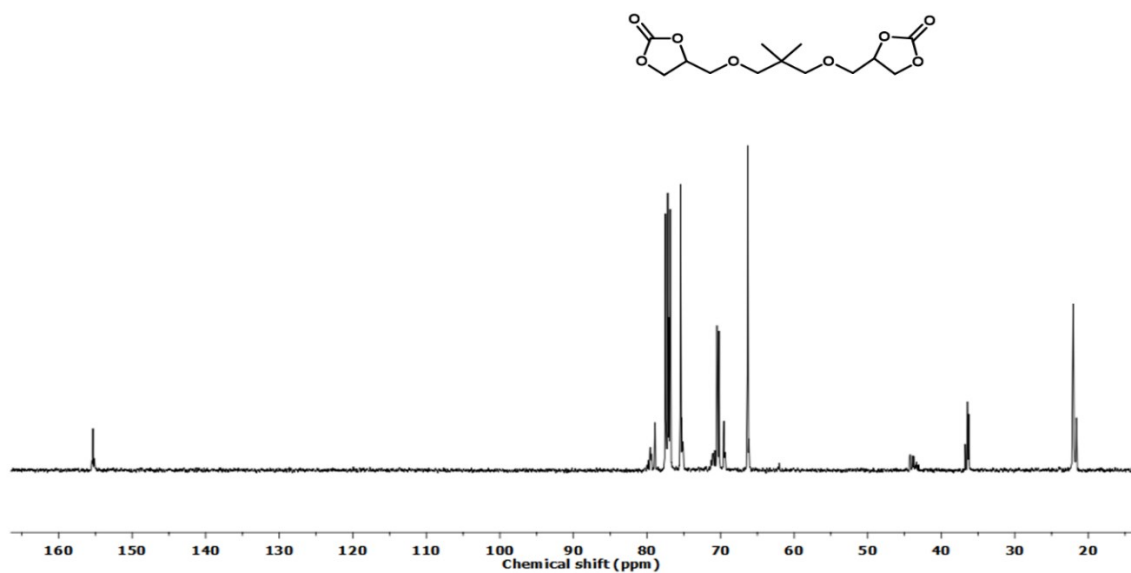

**Figure S19:**  $^{13}\text{C}$  NMR spectra of 4,4'-(((2,2-dimethylpropane-1,3-diyl)bis(oxy))bis(methylene)) bis(1,3-dioxolan-2-one) (**4h**).

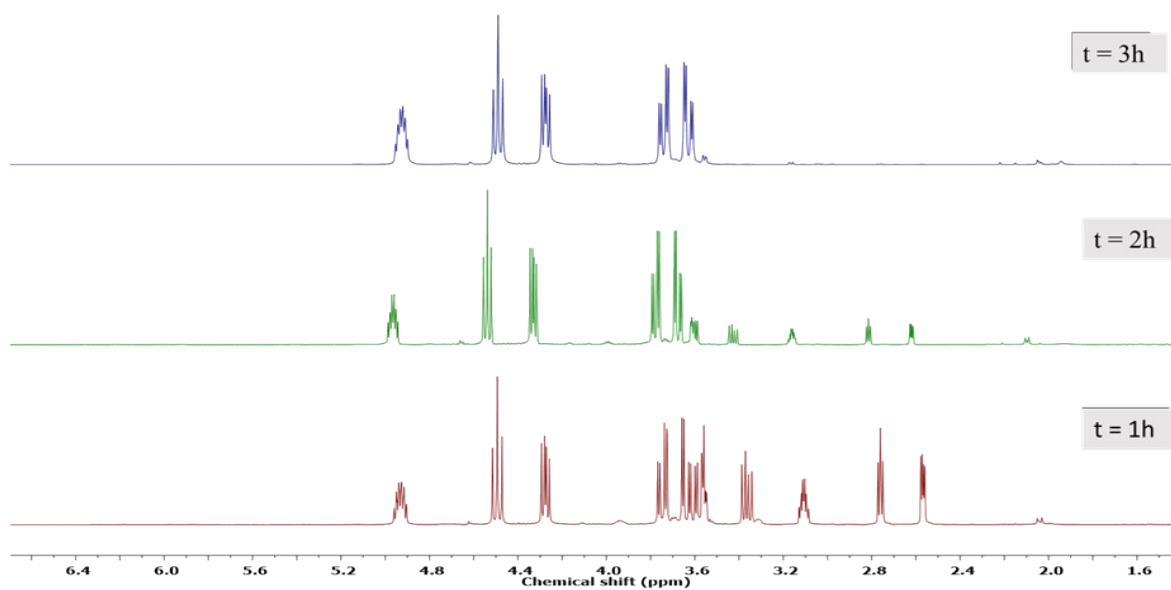

**Figure S20:** Time-dependant NMR spectra of the conversion of ECH to corresponding **4a** in the presence of **2** at 120 °C and 4 bar pressure.

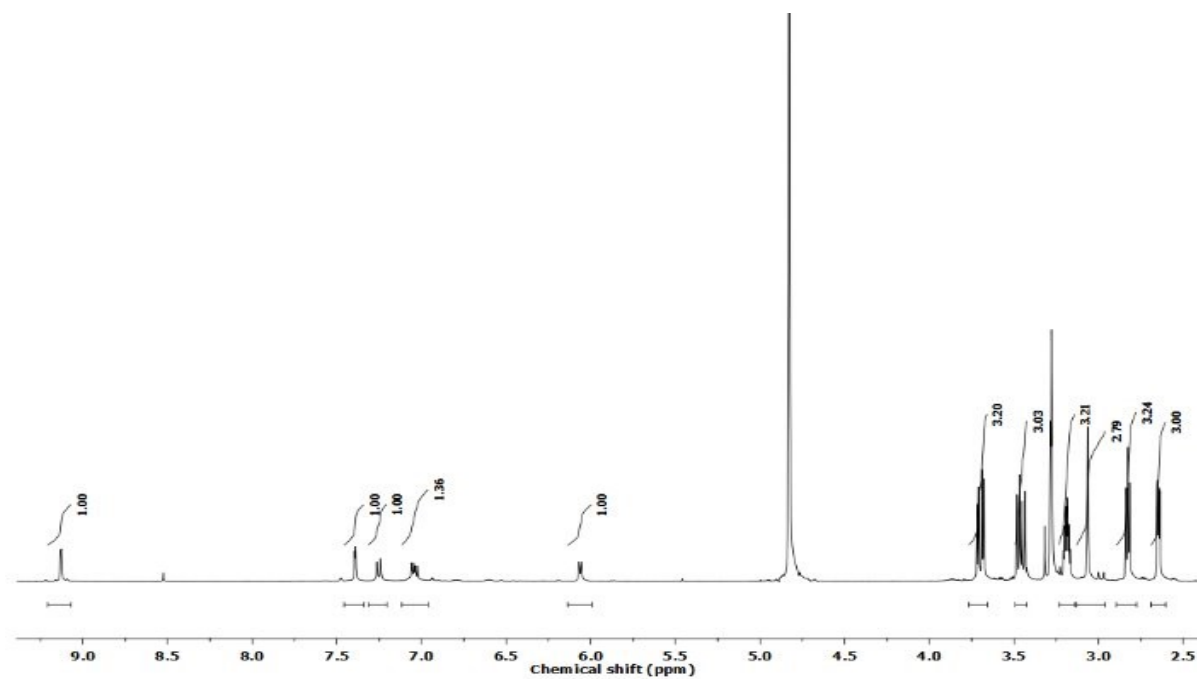

**Figure S21:** <sup>1</sup>H NMR spectrum of **2** and ECH

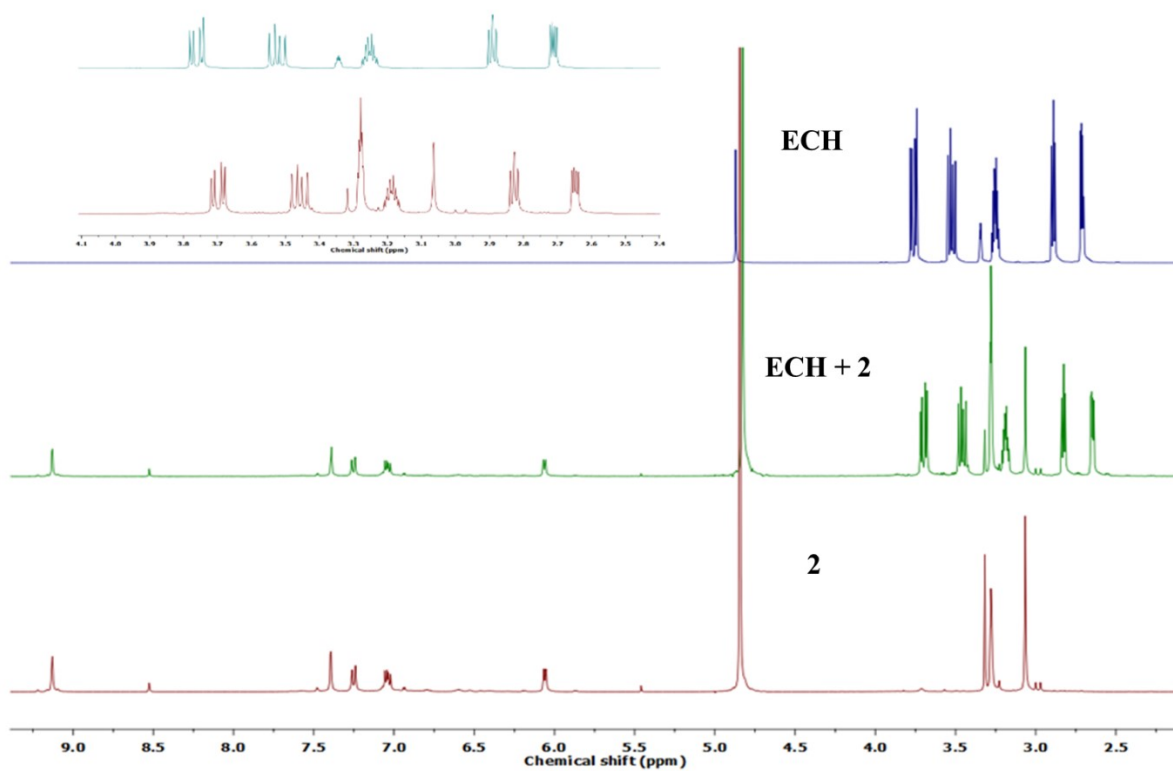

**Figure S22:** Stacked  $^1\text{H}$  NMR spectra of ECH, ECH+2 and 2 recorded in  $\text{CD}_3\text{OD}$

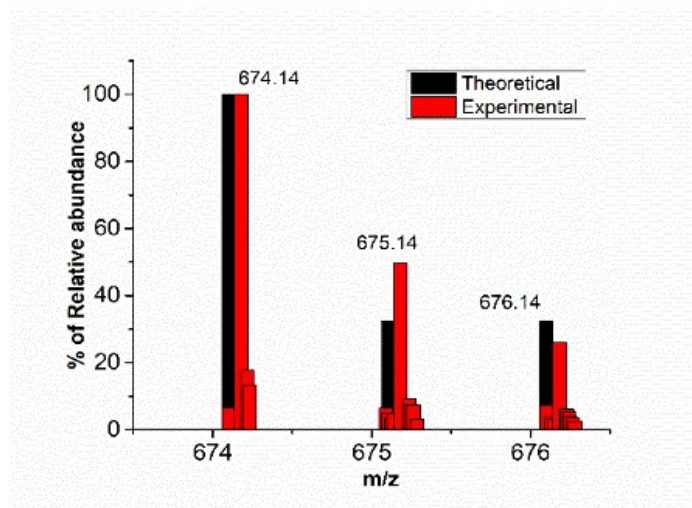

**Figure S23:** ESI-MS spectra of 2/ECH

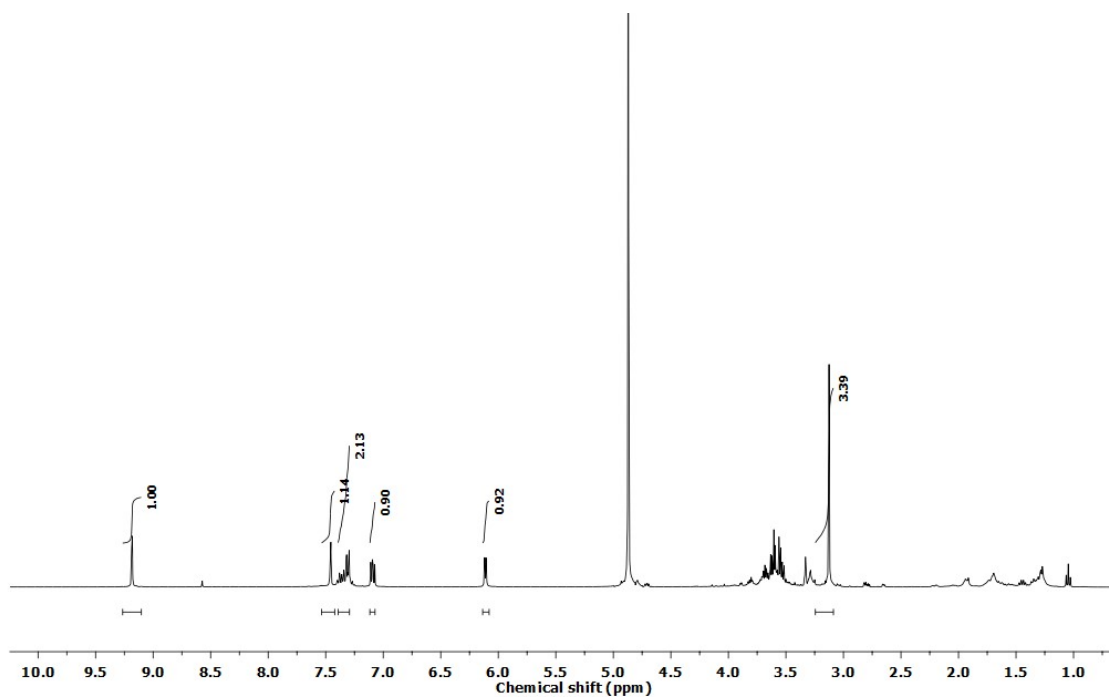

**Figure S24:**  $^1\text{H}$  NMR spectrum of **2** after the reaction with  $\text{CO}_2$

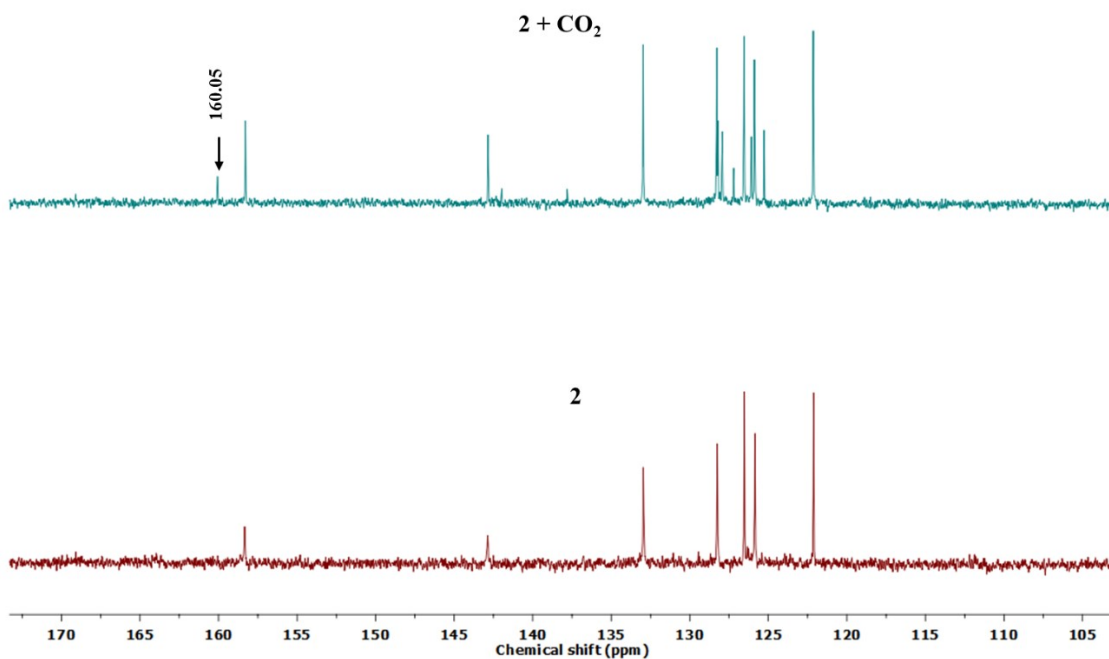

**Figure S25:**  $^{13}\text{C}$  NMR spectrum of **2** and after the reaction with  $\text{CO}_2$  (Note: only the range between 100-175 is shown here)

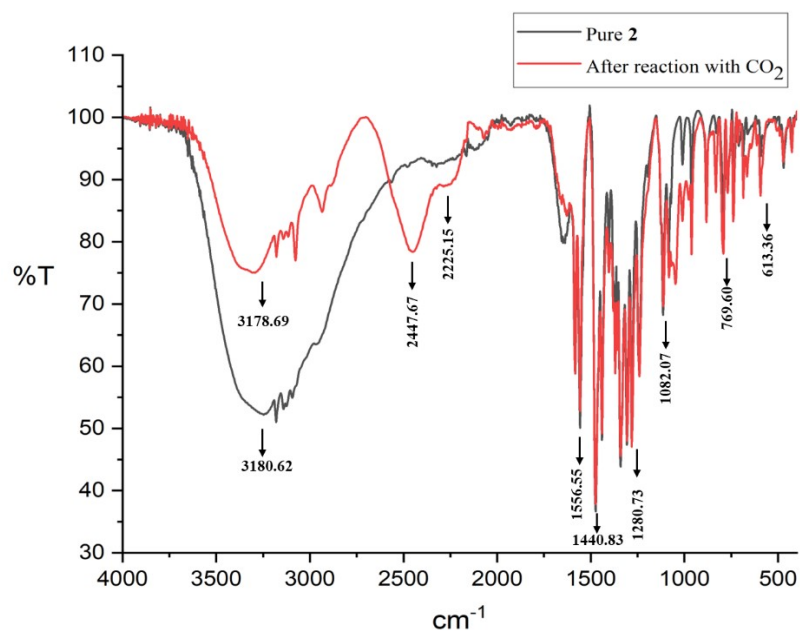

**Figure S26:** FT-IR spectra of **2** and after the reaction with CO<sub>2</sub>

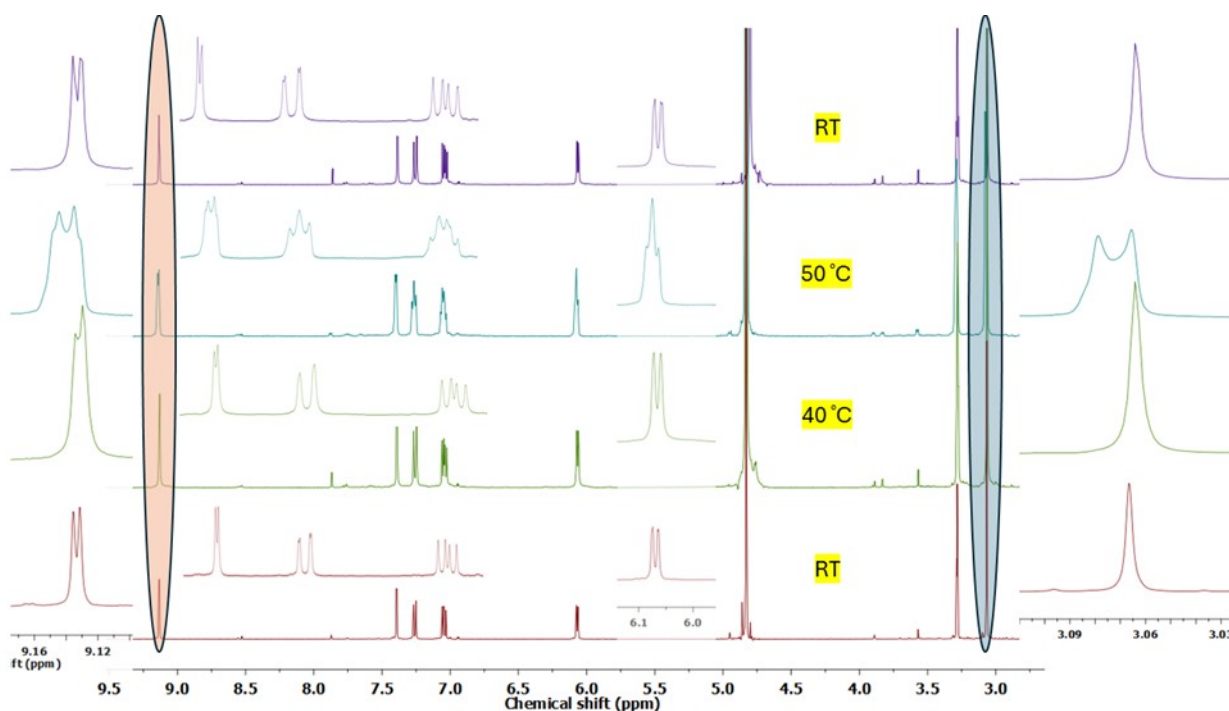

**Figure S27:** Variable temperature NMR of **2** recorded in CD<sub>3</sub>OD with the enlarged portion of spectra indicating the changes in peaks between the regions 3.0 – 9.5 ppm. Note: In the inset, the expanded regions are shown within the full spectrum.

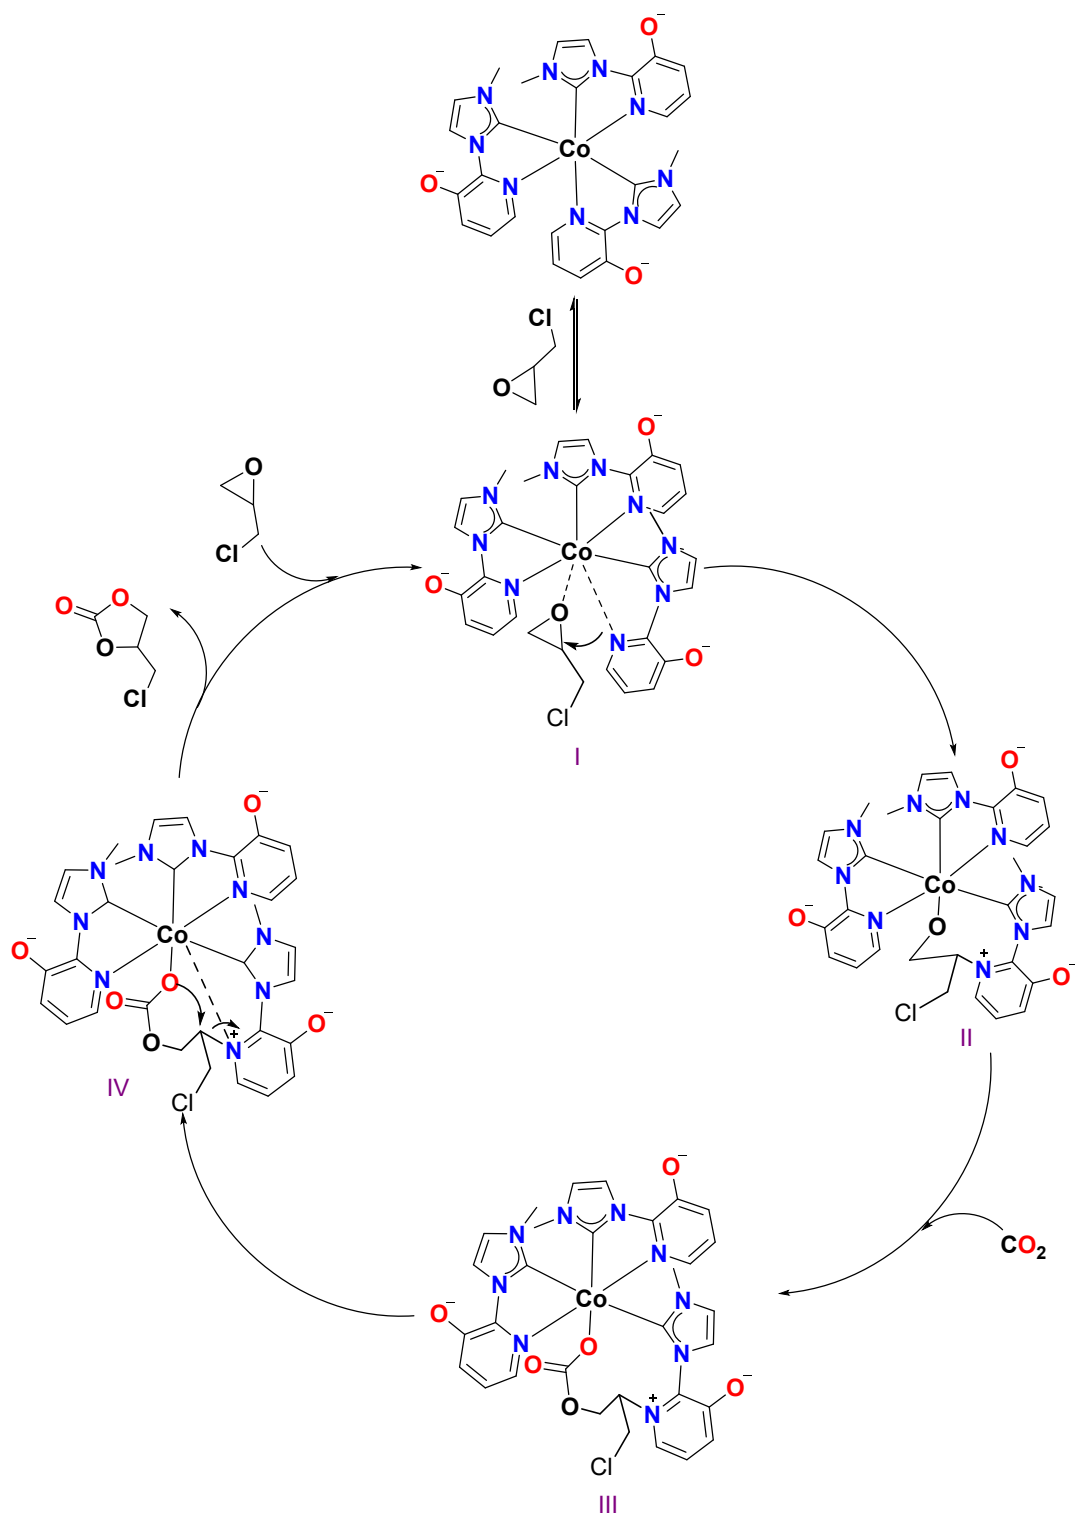

**Scheme S1:** The proposed mechanism of conversion ECH with  $\text{CO}_2$  in the presence of only catalyst **2**. Note: Here, in the case of ECH, an electronegative chloride is present, so methine carbon is more electrophilic also due to interaction with the Lewis acidic Co(III) center, the electrophilicity of that carbon is increasing, and pyridine lone pair helps in epoxide ring opening, and generating a secondary carbocation which the pyridine lone-pair can stabilize.[8]

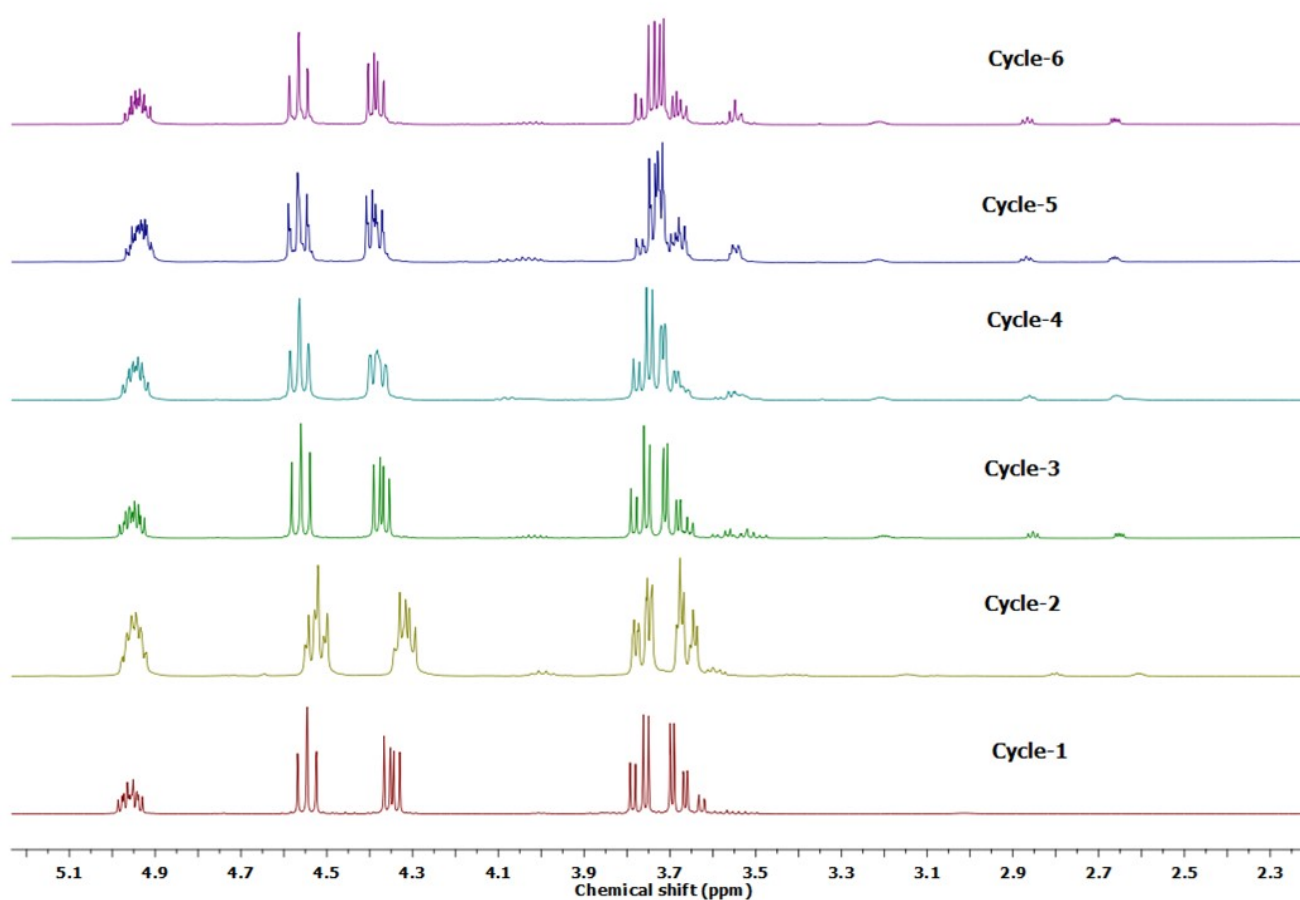

**Figure S28:** <sup>1</sup>H NMR spectra of the conversion of ECH to **4a** in the presence of catalyst **2** up to six cycles.

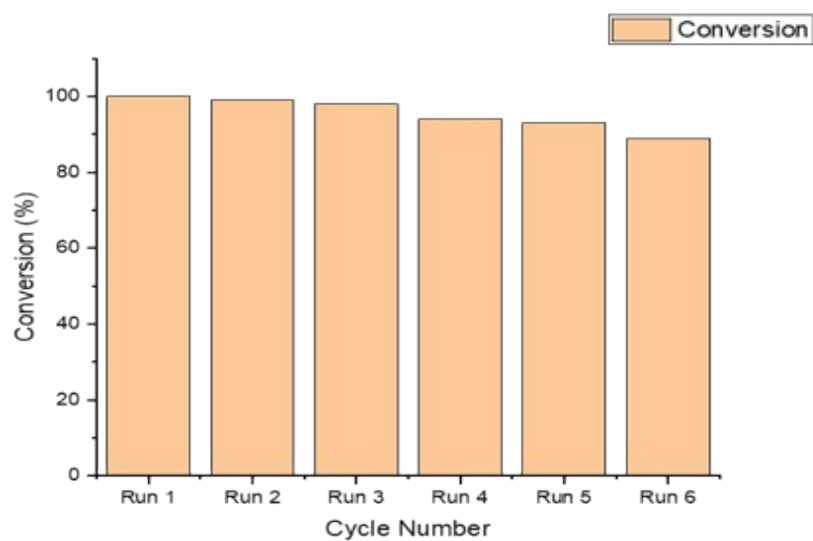

**Figure S29:** Reusability of catalyst **2** for the conversion of CO<sub>2</sub> with ECH.



**Table S4:** Comparison of **2** with other cobalt catalysts

| Entry | Substrate  | Catalyst | Cocatalyst  | Time (h)  | Temp (°C)  | CO <sub>2</sub> Pressure (atm) | Conv. (%)  | TON           | TOF (h <sup>-1</sup> ) | Ref              |
|-------|------------|----------|-------------|-----------|------------|--------------------------------|------------|---------------|------------------------|------------------|
| 1     | ECH        | Cobalt   | KBr         | 5         | 100        | 6                              | 85         | 42.5          | 8.5                    | 11               |
| 2     | ECH        | Cobalt   | TBAB        | 72        | 120        | 0.987                          | 84.3       | 168600        | 2342                   | 7                |
| 3     | ECH        | Cobalt   | TBAB        | 1         | 90         | 9.86                           | 99         | 3960          | 3960                   | 6                |
| 5     | ECH        | Cobalt   | TBAB        | 24        | 20         | 1                              | 48         | 960           | 40                     | 5                |
| 6     | ECH        | Cobalt   | DMAP        | 2         | 100        | 15.7                           | 71.6       | 716           | 358                    | 3                |
| 7     | ECH        | Cobalt   | TBAB        | 4         | 100        | 9.869                          | 96         | 757           | 189                    | 10               |
| 8     | ECH        | Cobalt   | DMAP        | 48        | 120        | 0.987                          | 99         | 200000        | 4166                   | 8                |
| 9     | ECH        | Cobalt   | DMAP        | 2         | 100        | 15.7                           | 97.9       | 979           | 490                    | 15               |
| 10    | ECH        | Cobalt   | -----       | 6         | 120        | 20                             | 99         | 990           | 165                    | 4                |
| 11    | ECH        | Cobalt   | TBAC        | 48        | 120        | 0.987                          | 85         | 85000         | 1770                   | 9                |
| 13    | ECH        | Cobalt   | TBAB        | 6         | 100        | 30                             | 99         | 1414          | 235                    | 14               |
| 14    | ECH        | Cobalt   | TBAI        | 24        | 65         | 1                              | 91         | 91            | 3.8                    | 13               |
| 15    | ECH        | Cobalt   | TBAB        | 24        | 30         | 3                              | 86         | 430           | 17.9                   | 12               |
| 16    | ECH        | Cobalt   | PPNCl       | 1         | 120        | 20                             | 41         | 41000         | 41000                  | 16               |
| 17    | <b>ECH</b> | <b>2</b> | <b>TBAB</b> | <b>3</b>  | <b>100</b> | <b>1</b>                       | <b>68</b>  | <b>158139</b> | <b>52713</b>           | <b>This work</b> |
| 18    | <b>ECH</b> | <b>2</b> | <b>TBAB</b> | <b>24</b> | <b>100</b> | <b>1</b>                       | <b>100</b> | <b>666667</b> | <b>27778</b>           | <b>This work</b> |

**Table S5:** Comparison of **2** with other earth-abundant metal catalysts

| Entry | Substrate        | Catalyst | Co-catalyst | Time (h)  | Temp (°C)  | CO <sub>2</sub> Pressure (atm) | Conv. (%)  | TON           | TOF (h <sup>-1</sup> ) | Ref              |
|-------|------------------|----------|-------------|-----------|------------|--------------------------------|------------|---------------|------------------------|------------------|
| 1     | 1,2 epoxy-hexane | Zn       | -----       | 120       | 120        | 17                             | 92         | 310000        | 2583                   | 17               |
| 2     | 1,2 epoxy-hexane | Zn       | -----       | 1         | 160        | 17                             | 79         | 40000         | 40000                  | 17               |
| 3     | ECH              | Zn       | TBAB        | 3         | 120        | 17                             | 80         | 800000        | 266667                 | 18               |
| 4     | ECH              | Zn       | TBAB        | 3         | 120        | 10                             | 84         | 1120000       | 373000                 | 19               |
| 5     | 1,2 epoxy-hexane | Mg       | -----       | 72        | 120        | 17                             | 67         | 220000        | 3056                   | 17               |
| 6     | 1,2 epoxy-hexane | Mg       | -----       | 1         | 160        | 17                             | 91         | 46000         | 46000                  | 17               |
| 7     | PO               | Al       | PPNCl       | 0.5       | 120        | 30                             | 46.3       | 92500         | 185000                 | 20               |
| 8     | <b>ECH</b>       | <b>2</b> | <b>TBAB</b> | <b>3</b>  | <b>100</b> | <b>1</b>                       | <b>68</b>  | <b>158139</b> | <b>52713</b>           | <b>This work</b> |
| 9     | <b>ECH</b>       | <b>2</b> | <b>TBAB</b> | <b>24</b> | <b>100</b> | <b>1</b>                       | <b>100</b> | <b>666667</b> | <b>27778</b>           | <b>This work</b> |

## Reference:

1. I. A. Bhat, I. Avinash and G. Anantharaman, *Organometallics*, 2019, **38**, 1699
2. (a) G. Sheldrick, Crystal structure refinement with SHELXL. *Acta Crystallogr., Sect. C: Struct. Chem.* 2015, **C71**,3. (b) L. J. Bourhis, O. V. Dolomanov, R. J. Gildea, J. A. K. Howard and H. Puschmann, The anatomy of a comprehensive constrained, restrained refinement program for the modern computing environment-Olex2 dissected. *Acta Crystallogr., Sect. A: Found. Adv.* 2015, **A71**,59. (c) (a) O. V. Dolomanov, L. J. Bourhis, R. J. Gildea, J. A. K. Howard, H. Puschmann, OLEX2: a complete structure solution, refinement and analysis program. *J. Appl. Crystallogr.* 2009, **42**, 339.
3. M. Kilic, E. Ulusoy, Aytar and M. Durgun, *J. Ind. Eng. Chem.*, 2015, **24**, 98.
4. X. Jiang, F. Gou, F. Chen and H. Jing, *Green Chem.*, 2016, **18**, 3567.
5. D. De, A. Bhattacharyya and P. K. Bharadwaj, *Inorg. Chem.*, 2017, **56**,11443.
6. W. Fan, W. Z. Wang, L. Wang, X. G. Jia, L. L. Li, T. C. Xiao and P. P. Edwards, *Catalysts*, 2019, **9**, 951.
7. Z. A. K. Khattak, H. A. Younus, N. Ahmad, H. Ullah, S. Suleman, M. S. Hossain, M. Elkadi and F. Verpoort, *Chem. Commun.*, 2019, **55**, 8274.
8. H. Ullah, B. Mousavi, H. A. Younus, Z. A. K. Khattak, S. Chaemchuen, S. Suleman and F. Verpoort, *Commun Chem.*, 2019, **2**, 42.
9. S. Suleman, H. A. Younus, N. Ahmad, Z. A. K. Khattak, H. Ullah, J. Park, T. Han, B. Yu and F. Verpoort, *Appl Catal A Gen.*, 2020, **591**, 117384.
10. R. Arunachalam, E. Chinnaraja, S. Subramanian, E. Suresh and P. S. Subramanian, *ACS Omega*, 2020., **5**, 14890.
11. F. Wu and Y. Lin, *Appl. Organomet. Chem.*, 2020, **34**, 5427.
12. W. Y. Song, Q. Liu, Q. Bu, D. Wei, B. Dai and N. Liu, *Organometallics.*, 2020, **39**, 3546.
13. X. He, Y. Wang, D. Yuan, H. You , Y. Yao, *Inorg. Chem.*, 2021, **60**, 11521.
14. J. L. S. Milani, A. F. A. d. Mata, I. S. Oliveira, A.K. S. M. Valdo, F. T. Martins, R. Rabelo, D. Cangussu, J. Cano, F. Lioret, M. Julve and R. P. D. Chagas, *Dalton Trans.*, 2022, **51**, 12258.
15. A. Alhafez, E. Aytar and A. Kilic, *J. CO2 Util.*, 2022, **63**, 102129.
16. B. Wang, X. Cao, L. Wang, X. Meng, Y. Wang, and W. Sun, *Inorg. Chem.*, 2024, **63**, 9156.
17. C. Maeda, T. Taniguchi, K. Ogawa, and T. Ema, *Angew. Chem. Int. Ed.* 2015, **54**, 134.
18. Y. Ge, G. Cheng, N. Xu, W. Wang, and H. Ke, *Catal. Sci. Technol.*, 2019, **9**, 4255.
19. J. B. D. Cruz, C. and H. Hung, *Catal. Sci. Technol.*, 2021, **11**, 2144.
20. Y. Qin, H. Guo, X. Sheng, X. Wang, and F. Wang, *Green. Chem.* 2015, **17**, 2853.
